# Supplementary material for: Agronomic Trait Variations and Ploidy Differentiation of Kiwiberries in Northwest China: Implication for Breeding
Source: PubMed Central journal article supplement (PMC5426280; doi:10.3389/fpls.2017.00711), 2017-05-11
Supplement: DataSheet1.pdf [file DataSheet1.pdf]

Supplement Table 1 The climate data of 16 populations of *A. arguta* var. *arguta*, *A. arguta* var. *giraldii* and *A. melanandra*

| Species                               | Ploidy levels | Population code | Altitude (m a.s.l.) | Annual cumulative sunshine hours (h, HS) | Monthly mean maximum temperature (°C) | Monthly mean minimum temperature (°C) | Monthly extreme maximum temperature (°C) | Monthly extreme minimum temperature (°C) | Monthly mean humidity (% rh) | Monthly mean maximum humidity (% rh) | Monthly mean minimum precipitation (mm) | Monthly mean maximum precipitation (mm) |
|---------------------------------------|---------------|-----------------|---------------------|------------------------------------------|---------------------------------------|---------------------------------------|------------------------------------------|------------------------------------------|------------------------------|--------------------------------------|-----------------------------------------|-----------------------------------------|
| <i>A. melanandra</i>                  | Tetraploid    | SZB             | 1424.00             | 1726.5                                   | 23.06                                 | -7.74                                 | 33.76                                    | -19.34                                   | 60.00                        | 83.00                                | 6.40                                    | 196.30                                  |
| <i>A. melanandra</i>                  | Tetraploid    | SZB             | 1516.33             | 1726.5                                   | 22.51                                 | -8.29                                 | 33.21                                    | -19.89                                   | 60.00                        | 83.00                                | 6.40                                    | 196.30                                  |
| <i>A. melanandra</i>                  | Tetraploid    | SZB             | 1608.67             | 1726.5                                   | 21.95                                 | -8.85                                 | 32.65                                    | -20.45                                   | 60.00                        | 83.00                                | 6.40                                    | 196.30                                  |
| <i>A. melanandra</i>                  | Tetraploid    | SZB             | 1701.00             | 1726.5                                   | 21.40                                 | -9.40                                 | 32.10                                    | -21.00                                   | 60.00                        | 83.00                                | 6.40                                    | 196.30                                  |
| <i>A. arguta</i> var. <i>giraldii</i> | Decaploid     | SZB             | 1385.00             | 1726.5                                   | 23.30                                 | -7.50                                 | 34.00                                    | -19.10                                   | 60.00                        | 83.00                                | 6.40                                    | 196.30                                  |
| <i>A. melanandra</i>                  | Tetraploid    | SSH             | 1371.00             | 2312.6                                   | 28.60                                 | -6.40                                 | 38.60                                    | -22.60                                   | 61.00                        | 81.00                                | 8.50                                    | 127.30                                  |
| <i>A. melanandra</i>                  | Tetraploid    | SSH             | 1372.00             | 2312.6                                   | 28.59                                 | -6.41                                 | 38.59                                    | -22.61                                   | 61.00                        | 81.00                                | 8.50                                    | 127.30                                  |
| <i>A. melanandra</i>                  | Tetraploid    | SSH             | 1373.00             | 2312.6                                   | 28.59                                 | -6.41                                 | 38.59                                    | -22.61                                   | 61.00                        | 81.00                                | 8.50                                    | 127.30                                  |
| <i>A. melanandra</i>                  | Tetraploid    | SSH             | 1374.00             | 2312.6                                   | 28.58                                 | -6.42                                 | 38.58                                    | -22.62                                   | 61.00                        | 81.00                                | 8.50                                    | 127.30                                  |
| <i>A. melanandra</i>                  | Tetraploid    | SSH             | 1375.00             | 2312.6                                   | 28.58                                 | -6.42                                 | 38.58                                    | -22.62                                   | 61.00                        | 81.00                                | 8.50                                    | 127.30                                  |
| <i>A. melanandra</i>                  | Tetraploid    | SSH             | 1376.00             | 2312.6                                   | 28.57                                 | -6.43                                 | 38.57                                    | -22.63                                   | 61.00                        | 81.00                                | 8.50                                    | 127.30                                  |
| <i>A. melanandra</i>                  | Tetraploid    | SSH             | 1378.00             | 2312.6                                   | 28.56                                 | -6.44                                 | 38.56                                    | -22.64                                   | 61.00                        | 81.00                                | 8.50                                    | 127.30                                  |
| <i>A. arguta</i> var. <i>arguta</i>   | Tetraploid    | SNT             | 601.00              | 1726.5                                   | 29.20                                 | -3.10                                 | 37.40                                    | -16.40                                   | 70.00                        | 87.00                                | 6.20                                    | 193.90                                  |
| <i>A. arguta</i> var. <i>arguta</i>   | Tetraploid    | SNT             | 648.50              | 1726.5                                   | 27.72                                 | -3.09                                 | 38.42                                    | -14.69                                   | 60.00                        | 83.00                                | 6.40                                    | 196.30                                  |
| <i>A. arguta</i> var. <i>arguta</i>   | Tetraploid    | SNT             | 696.00              | 1726.5                                   | 27.43                                 | -3.37                                 | 38.13                                    | -14.97                                   | 60.00                        | 83.00                                | 6.40                                    | 196.30                                  |
| <i>A. melanandra</i>                  | Tetraploid    | SMT             | 1260.00             | 2015.2                                   | 25.50                                 | -7.90                                 | 34.00                                    | -29.80                                   | 60.00                        | 82.00                                | 4.00                                    | 140.30                                  |
| <i>A. melanandra</i>                  | Tetraploid    | SMT             | 1300.00             | 2015.2                                   | 25.26                                 | -8.14                                 | 33.76                                    | -30.04                                   | 60.00                        | 82.00                                | 4.00                                    | 140.30                                  |
| <i>A. arguta</i> var. <i>arguta</i>   | Tetraploid    | SMT             | 1260.00             | 2015.2                                   | 28.00                                 | -2.80                                 | 38.70                                    | -14.40                                   | 60.00                        | 83.00                                | 6.40                                    | 196.30                                  |
| <i>A. arguta</i> var. <i>arguta</i>   | Tetraploid    | SMT             | 1270.00             | 2015.2                                   | 27.94                                 | -2.86                                 | 38.64                                    | -14.46                                   | 60.00                        | 83.00                                | 6.40                                    | 196.30                                  |
| <i>A. arguta</i> var. <i>arguta</i>   | Tetraploid    | SMT             | 1280.00             | 2015.2                                   | 25.38                                 | -8.02                                 | 33.88                                    | -29.92                                   | 60.00                        | 82.00                                | 4.00                                    | 140.30                                  |
| <i>A. arguta</i> var. <i>arguta</i>   | Tetraploid    | SMT             | 1290.00             | 2015.2                                   | 25.32                                 | -8.08                                 | 33.82                                    | -29.98                                   | 60.00                        | 82.00                                | 4.00                                    | 140.30                                  |
| <i>A. arguta</i> var. <i>arguta</i>   | Tetraploid    | SMT             | 1300.00             | 2015.2                                   | 25.26                                 | -8.14                                 | 33.76                                    | -30.04                                   | 60.00                        | 82.00                                | 4.00                                    | 140.30                                  |
| <i>A. arguta</i> var. <i>giraldii</i> | Decaploid     | SMT             | 1285.00             | 2015.2                                   | 25.35                                 | -8.05                                 | 33.85                                    | -29.95                                   | 60.00                        | 82.00                                | 4.00                                    | 140.30                                  |
| <i>A. melanandra</i>                  | Tetraploid    | SLQ             | 1200.00             | 2312.6                                   | 28.51                                 | -6.49                                 | 38.51                                    | -22.69                                   | 61.00                        | 81.00                                | 8.50                                    | 127.30                                  |
| <i>A. arguta</i> var. <i>arguta</i>   | Tetraploid    | SLQ             | 1185.00             | 2312.6                                   | 28.60                                 | -6.40                                 | 38.60                                    | -22.60                                   | 61.00                        | 81.00                                | 8.50                                    | 127.30                                  |
| <i>A. arguta</i> var. <i>arguta</i>   | Tetraploid    | SLQ             | 1236.25             | 2312.6                                   | 28.29                                 | -6.71                                 | 38.29                                    | -22.91                                   | 61.00                        | 81.00                                | 8.50                                    | 127.30                                  |
| <i>A. arguta</i> var. <i>arguta</i>   | Tetraploid    | SLQ             | 1287.50             | 2312.6                                   | 27.99                                 | -7.02                                 | 37.99                                    | -23.22                                   | 61.00                        | 81.00                                | 8.50                                    | 127.30                                  |
| <i>A. arguta</i> var. <i>arguta</i>   | Tetraploid    | SLQ             | 1338.75             | 2312.6                                   | 27.68                                 | -7.32                                 | 37.68                                    | -23.52                                   | 61.00                        | 81.00                                | 8.50                                    | 127.30                                  |
| <i>A. arguta</i> var. <i>arguta</i>   | Tetraploid    | SLQ             | 1390.00             | 2312.6                                   | 27.37                                 | -7.63                                 | 37.37                                    | -23.83                                   | 61.00                        | 81.00                                | 8.50                                    | 127.30                                  |
| <i>A. melanandra</i>                  | Tetraploid    | SLG             | 1406.00             | 2350.00                                  | 32.50                                 | -4.40                                 | 42.80                                    | -16.70                                   | 63.00                        | 82.00                                | 5.50                                    | 95.00                                   |
| <i>A. melanandra</i>                  | Tetraploid    | SLG             | 1406.80             | 2350.00                                  | 32.50                                 | -4.40                                 | 42.80                                    | -16.70                                   | 63.00                        | 82.00                                | 5.50                                    | 95.00                                   |
| <i>A. melanandra</i>                  | Tetraploid    | SLG             | 1407.60             | 2350.00                                  | 32.51                                 | -4.41                                 | 42.79                                    | -16.71                                   | 63.00                        | 82.00                                | 5.50                                    | 95.00                                   |

|                                       |                |         |         |       |       |       |        |       |       |       |        |
|---------------------------------------|----------------|---------|---------|-------|-------|-------|--------|-------|-------|-------|--------|
| <i>A. melanandra</i>                  | Tetraploid SLG | 1408.40 | 2350.00 | 32.51 | -4.41 | 42.79 | -16.71 | 63.00 | 82.00 | 5.50  | 95.00  |
| <i>A. melanandra</i>                  | Tetraploid SLG | 1409.20 | 2350.00 | 32.52 | -4.42 | 42.78 | -16.72 | 63.00 | 82.00 | 5.50  | 95.00  |
| <i>A. melanandra</i>                  | Tetraploid SLG | 1410.00 | 2350.00 | 32.52 | -4.42 | 42.78 | -16.72 | 63.00 | 82.00 | 5.50  | 95.00  |
| <i>A. arguta</i> var. <i>arguta</i>   | Tetraploid SLG | 1406.00 | 2350.00 | 32.50 | -4.40 | 42.80 | -16.70 | 63.00 | 82.00 | 5.50  | 95.00  |
| <i>A. arguta</i> var. <i>arguta</i>   | Tetraploid SLG | 1406.57 | 2350.00 | 32.50 | -4.40 | 42.80 | -16.70 | 63.00 | 82.00 | 5.50  | 95.00  |
| <i>A. arguta</i> var. <i>arguta</i>   | Tetraploid SLG | 1407.14 | 2350.00 | 32.51 | -4.41 | 42.79 | -16.71 | 63.00 | 82.00 | 5.50  | 95.00  |
| <i>A. arguta</i> var. <i>arguta</i>   | Tetraploid SLG | 1407.71 | 2350.00 | 32.51 | -4.41 | 42.79 | -16.71 | 63.00 | 82.00 | 5.50  | 95.00  |
| <i>A. arguta</i> var. <i>arguta</i>   | Tetraploid SLG | 1408.28 | 2350.00 | 32.51 | -4.41 | 42.79 | -16.71 | 63.00 | 82.00 | 5.50  | 95.00  |
| <i>A. arguta</i> var. <i>arguta</i>   | Tetraploid SLG | 1408.85 | 2350.00 | 32.52 | -4.42 | 42.78 | -16.72 | 63.00 | 82.00 | 5.50  | 95.00  |
| <i>A. arguta</i> var. <i>arguta</i>   | Tetraploid SLG | 1409.42 | 2350.00 | 32.52 | -4.42 | 42.78 | -16.72 | 63.00 | 82.00 | 5.50  | 95.00  |
| <i>A. arguta</i> var. <i>arguta</i>   | Tetraploid SLG | 1410.00 | 2350.00 | 32.52 | -4.42 | 42.78 | -16.72 | 63.00 | 82.00 | 5.50  | 95.00  |
| <i>A. arguta</i> var. <i>giraldii</i> | Octaploid SHX  | 1550.00 | 1850.00 | 27.19 | -5.11 | 35.39 | -18.41 | 70.00 | 87.00 | 6.20  | 193.90 |
| <i>A. melanandra</i>                  | Tetraploid SHX | 1500.00 | 1850.00 | 27.49 | -4.81 | 35.69 | -18.11 | 70.00 | 87.00 | 6.20  | 193.90 |
| <i>A. melanandra</i>                  | Tetraploid SHX | 1550.00 | 1850.00 | 27.19 | -5.11 | 35.39 | -18.41 | 70.00 | 87.00 | 6.20  | 193.90 |
| <i>A. arguta</i> var. <i>arguta</i>   | Tetraploid SHX | 1500.00 | 1850.00 | 27.49 | -4.81 | 35.69 | -18.11 | 70.00 | 87.00 | 6.20  | 193.90 |
| <i>A. arguta</i> var. <i>arguta</i>   | Tetraploid SHX | 1672.00 | 1850.00 | 26.46 | -5.84 | 34.66 | -19.14 | 70.00 | 87.00 | 6.20  | 193.90 |
| <i>A. arguta</i> var. <i>giraldii</i> | Octaploid SHH  | 1215.00 | 1850.00 | 29.20 | -3.10 | 37.40 | -16.40 | 70.00 | 87.00 | 6.20  | 193.90 |
| <i>A. arguta</i> var. <i>giraldii</i> | Octaploid SHH  | 1283.00 | 1850.00 | 28.79 | -3.51 | 36.99 | -16.81 | 70.00 | 87.00 | 6.20  | 193.90 |
| <i>A. arguta</i> var. <i>giraldii</i> | Octaploid SHH  | 1351.00 | 1850.00 | 28.38 | -3.92 | 36.58 | -17.22 | 70.00 | 87.00 | 6.20  | 193.90 |
| <i>A. arguta</i> var. <i>giraldii</i> | Octaploid SHH  | 1419.00 | 1850.00 | 27.98 | -4.32 | 36.18 | -17.62 | 70.00 | 87.00 | 6.20  | 193.90 |
| <i>A. arguta</i> var. <i>giraldii</i> | Decaploid SHH  | 1317.00 | 1850.00 | 28.59 | -3.71 | 36.79 | -17.01 | 70.00 | 87.00 | 6.20  | 193.90 |
| <i>A. arguta</i> var. <i>giraldii</i> | Octaploid SCP  | 1545.00 | 1860.2  | 29.70 | -4.70 | 39.00 | -17.50 | 60.00 | 82.00 | 5.10  | 158.70 |
| <i>A. arguta</i> var. <i>giraldii</i> | Octaploid SCP  | 1566.00 | 1860.2  | 29.57 | -4.83 | 38.87 | -17.63 | 60.00 | 82.00 | 5.10  | 158.70 |
| <i>A. arguta</i> var. <i>giraldii</i> | Octaploid SCP  | 1587.00 | 1860.2  | 29.45 | -4.95 | 38.75 | -17.75 | 60.00 | 82.00 | 5.10  | 158.70 |
| <i>A. arguta</i> var. <i>giraldii</i> | Octaploid SBX  | 1232.00 | 1860.2  | 31.20 | -3.10 | 41.70 | -16.10 | 60.00 | 77.00 | 5.10  | 125.20 |
| <i>A. arguta</i> var. <i>giraldii</i> | Decaploid SBX  | 1291.00 | 2120.00 | 30.85 | -3.45 | 41.35 | -16.45 | 60.00 | 77.00 | 5.10  | 125.20 |
| <i>A. arguta</i> var. <i>giraldii</i> | Decaploid SBX  | 1350.00 | 2120.00 | 30.49 | -3.81 | 40.99 | -16.81 | 60.00 | 77.00 | 5.10  | 125.20 |
| <i>A. arguta</i> var. <i>giraldii</i> | Decaploid SBX  | 1350.00 | 2120.00 | 30.49 | -3.81 | 40.99 | -16.81 | 60.00 | 77.00 | 5.10  | 125.20 |
| <i>A. arguta</i> var. <i>giraldii</i> | Decaploid SBX  | 1289.00 | 2120.00 | 30.86 | -3.44 | 41.36 | -16.44 | 60.00 | 77.00 | 5.10  | 125.20 |
| <i>A. arguta</i> var. <i>giraldii</i> | Octaploid HNT  | 1005.00 | 1800.00 | 30.48 | -2.52 | 40.18 | -12.52 | 63.00 | 81.00 | 13.60 | 184.80 |
| <i>A. arguta</i> var. <i>arguta</i>   | Tetraploid HNT | 1005.00 | 1800.00 | 30.48 | -2.52 | 40.18 | -12.52 | 63.00 | 81.00 | 13.60 | 184.80 |
| <i>A. arguta</i> var. <i>arguta</i>   | Tetraploid HNT | 1033.40 | 1800.00 | 30.31 | -2.69 | 40.01 | -12.69 | 63.00 | 81.00 | 13.60 | 184.80 |
| <i>A. arguta</i> var. <i>arguta</i>   | Tetraploid HNT | 1061.80 | 1800.00 | 30.14 | -2.86 | 39.84 | -12.86 | 63.00 | 81.00 | 13.60 | 184.80 |
| <i>A. arguta</i> var. <i>arguta</i>   | Tetraploid HNT | 1090.20 | 1800.00 | 29.97 | -3.03 | 39.67 | -13.03 | 63.00 | 81.00 | 13.60 | 184.80 |
| <i>A. arguta</i> var. <i>arguta</i>   | Tetraploid HNT | 1118.60 | 1800.00 | 29.80 | -3.20 | 39.50 | -13.20 | 63.00 | 81.00 | 13.60 | 184.80 |
| <i>A. arguta</i> var. <i>arguta</i>   | Tetraploid HNT | 1147.00 | 1800.00 | 29.63 | -3.37 | 39.33 | -13.37 | 63.00 | 81.00 | 13.60 | 184.80 |
| <i>A. arguta</i> var. <i>arguta</i>   | Tetraploid HNT | 1175.40 | 1800.00 | 29.46 | -3.54 | 39.16 | -13.54 | 63.00 | 81.00 | 13.60 | 184.80 |
| <i>A. arguta</i> var. <i>arguta</i>   | Tetraploid HNT | 1203.80 | 1800.00 | 29.29 | -3.71 | 38.99 | -13.71 | 63.00 | 81.00 | 13.60 | 184.80 |

|                                       |                |         |         |       |       |       |        |       |       |       |        |
|---------------------------------------|----------------|---------|---------|-------|-------|-------|--------|-------|-------|-------|--------|
| <i>A. arguta</i> var. <i>arguta</i>   | Tetraploid HNT | 1232.20 | 1800.00 | 29.12 | -3.88 | 38.82 | -13.88 | 63.00 | 81.00 | 13.60 | 184.80 |
| <i>A. arguta</i> var. <i>arguta</i>   | Tetraploid HNT | 1260.60 | 1800.00 | 28.95 | -4.05 | 38.65 | -14.05 | 63.00 | 81.00 | 13.60 | 184.80 |
| <i>A. arguta</i> var. <i>arguta</i>   | Tetraploid HNT | 1289.00 | 1800.00 | 28.78 | -4.22 | 38.48 | -14.22 | 63.00 | 81.00 | 13.60 | 184.80 |
| <i>A. arguta</i> var. <i>arguta</i>   | Tetraploid HNT | 1317.40 | 1800.00 | 28.61 | -4.39 | 38.31 | -14.39 | 63.00 | 81.00 | 13.60 | 184.80 |
| <i>A. arguta</i> var. <i>arguta</i>   | Tetraploid HNT | 1345.80 | 1800.00 | 28.44 | -4.56 | 38.14 | -14.56 | 63.00 | 81.00 | 13.60 | 184.80 |
| <i>A. arguta</i> var. <i>arguta</i>   | Tetraploid HNT | 1374.20 | 1800.00 | 28.26 | -4.74 | 37.96 | -14.74 | 63.00 | 81.00 | 13.60 | 184.80 |
| <i>A. arguta</i> var. <i>arguta</i>   | Tetraploid HNT | 1402.60 | 1800.00 | 28.09 | -4.91 | 37.79 | -14.91 | 63.00 | 81.00 | 13.60 | 184.80 |
| <i>A. arguta</i> var. <i>arguta</i>   | Tetraploid HNT | 1431.00 | 1800.00 | 27.92 | -5.08 | 37.62 | -15.08 | 63.00 | 81.00 | 13.60 | 184.80 |
| <i>A. arguta</i> var. <i>giraldii</i> | Octaploid HNS  | 1276.00 | 1800.00 | 28.85 | -4.15 | 38.55 | -14.15 | 63.00 | 81.00 | 13.60 | 184.80 |
| <i>A. arguta</i> var. <i>giraldii</i> | Octaploid HNS  | 1315.33 | 1800.00 | 28.62 | -4.38 | 38.32 | -14.38 | 63.00 | 81.00 | 13.60 | 184.80 |
| <i>A. arguta</i> var. <i>giraldii</i> | Octaploid HNS  | 1354.67 | 1800.00 | 28.38 | -4.62 | 38.08 | -14.62 | 63.00 | 81.00 | 13.60 | 184.80 |
| <i>A. arguta</i> var. <i>giraldii</i> | Octaploid HNS  | 1394.00 | 1800.00 | 28.15 | -4.85 | 37.85 | -14.85 | 63.00 | 81.00 | 13.60 | 184.80 |
| <i>A. arguta</i> var. <i>giraldii</i> | Octaploid HNS  | 1433.33 | 1800.00 | 27.91 | -5.09 | 37.61 | -15.09 | 63.00 | 81.00 | 13.60 | 184.80 |
| <i>A. arguta</i> var. <i>giraldii</i> | Octaploid HNS  | 1472.67 | 1800.00 | 27.67 | -5.33 | 37.37 | -15.33 | 63.00 | 81.00 | 13.60 | 184.80 |
| <i>A. arguta</i> var. <i>giraldii</i> | Octaploid HNS  | 1512.00 | 1800.00 | 27.44 | -5.56 | 37.14 | -15.56 | 63.00 | 81.00 | 13.60 | 184.80 |
| <i>A. arguta</i> var. <i>arguta</i>   | Tetraploid HNS | 1148.00 | 1800.00 | 29.62 | -3.38 | 39.32 | -13.38 | 63.00 | 81.00 | 13.60 | 184.80 |
| <i>A. arguta</i> var. <i>arguta</i>   | Tetraploid HNS | 1149.33 | 1800.00 | 29.61 | -3.39 | 39.31 | -13.39 | 63.00 | 81.00 | 13.60 | 184.80 |
| <i>A. arguta</i> var. <i>arguta</i>   | Tetraploid HNS | 1150.67 | 1800.00 | 29.61 | -3.39 | 39.31 | -13.39 | 63.00 | 81.00 | 13.60 | 184.80 |
| <i>A. arguta</i> var. <i>arguta</i>   | Tetraploid HNS | 1152.00 | 1800.00 | 29.60 | -3.40 | 39.30 | -13.40 | 63.00 | 81.00 | 13.60 | 184.80 |
| <i>A. arguta</i> var. <i>arguta</i>   | Tetraploid HNL | 835.00  | 1800.00 | 31.50 | -1.50 | 41.20 | -11.50 | 63.00 | 81.00 | 13.60 | 184.80 |
| <i>A. arguta</i> var. <i>arguta</i>   | Tetraploid HNL | 858.00  | 1800.00 | 31.36 | -1.64 | 41.06 | -11.64 | 63.00 | 81.00 | 13.60 | 184.80 |
| <i>A. arguta</i> var. <i>arguta</i>   | Tetraploid HNL | 881.00  | 1800.00 | 31.22 | -1.78 | 40.92 | -11.78 | 63.00 | 81.00 | 13.60 | 184.80 |
| <i>A. arguta</i> var. <i>arguta</i>   | Tetraploid HNL | 904.00  | 1800.00 | 31.09 | -1.91 | 40.79 | -11.91 | 63.00 | 81.00 | 13.60 | 184.80 |
| <i>A. arguta</i> var. <i>arguta</i>   | Tetraploid HNL | 927.00  | 1800.00 | 30.95 | -2.05 | 40.65 | -12.05 | 63.00 | 81.00 | 13.60 | 184.80 |
| <i>A. arguta</i> var. <i>arguta</i>   | Tetraploid HNL | 950.00  | 1800.00 | 30.81 | -2.19 | 40.51 | -12.19 | 63.00 | 81.00 | 13.60 | 184.80 |
| <i>A. arguta</i> var. <i>arguta</i>   | Tetraploid HNL | 973.00  | 1800.00 | 30.67 | -2.33 | 40.37 | -12.33 | 63.00 | 81.00 | 13.60 | 184.80 |
| <i>A. arguta</i> var. <i>arguta</i>   | Tetraploid HNL | 996.00  | 1800.00 | 30.53 | -2.47 | 40.23 | -12.47 | 63.00 | 81.00 | 13.60 | 184.80 |
| <i>A. arguta</i> var. <i>arguta</i>   | Tetraploid HNL | 1019.00 | 1800.00 | 30.40 | -2.60 | 40.10 | -12.60 | 63.00 | 81.00 | 13.60 | 184.80 |
| <i>A. arguta</i> var. <i>arguta</i>   | Tetraploid HNL | 1042.00 | 1800.00 | 30.26 | -2.74 | 39.96 | -12.74 | 63.00 | 81.00 | 13.60 | 184.80 |
| <i>A. arguta</i> var. <i>arguta</i>   | Tetraploid HNL | 1065.00 | 1800.00 | 30.12 | -2.88 | 39.82 | -12.88 | 63.00 | 81.00 | 13.60 | 184.80 |
| <i>A. arguta</i> var. <i>arguta</i>   | Tetraploid HNL | 1088.00 | 1800.00 | 29.98 | -3.02 | 39.68 | -13.02 | 63.00 | 81.00 | 13.60 | 184.80 |
| <i>A. arguta</i> var. <i>arguta</i>   | Tetraploid HNL | 1111.00 | 1800.00 | 29.84 | -3.16 | 39.54 | -13.16 | 63.00 | 81.00 | 13.60 | 184.80 |
| <i>A. arguta</i> var. <i>arguta</i>   | Tetraploid HLS | 1140.00 | 1800.00 | 29.67 | -3.33 | 39.37 | -13.33 | 63.00 | 81.00 | 13.60 | 184.80 |
| <i>A. arguta</i> var. <i>arguta</i>   | Tetraploid HLS | 1176.50 | 1800.00 | 29.45 | -3.55 | 39.15 | -13.55 | 63.00 | 81.00 | 13.60 | 184.80 |
| <i>A. arguta</i> var. <i>arguta</i>   | Tetraploid HLS | 1213.00 | 1800.00 | 29.23 | -3.77 | 38.93 | -13.77 | 63.00 | 81.00 | 13.60 | 184.80 |
| <i>A. arguta</i> var. <i>arguta</i>   | Tetraploid HLS | 1249.50 | 1800.00 | 29.01 | -3.99 | 38.71 | -13.99 | 63.00 | 81.00 | 13.60 | 184.80 |
| <i>A. arguta</i> var. <i>arguta</i>   | Tetraploid HLS | 1286.00 | 1800.00 | 28.79 | -4.21 | 38.49 | -14.21 | 63.00 | 81.00 | 13.60 | 184.80 |
| <i>A. arguta</i> var. <i>arguta</i>   | Tetraploid HLS | 1322.50 | 1800.00 | 28.58 | -4.43 | 38.28 | -14.43 | 63.00 | 81.00 | 13.60 | 184.80 |

|                                       |                |         |         |       |       |       |        |       |       |       |        |
|---------------------------------------|----------------|---------|---------|-------|-------|-------|--------|-------|-------|-------|--------|
| <i>A. arguta</i> var. <i>arguta</i>   | Tetraploid HLS | 1359.00 | 1800.00 | 28.36 | -4.64 | 38.06 | -14.64 | 63.00 | 81.00 | 13.60 | 184.80 |
| <i>A. melanandra</i>                  | Tetraploid GTM | 1560.00 | 2100    | 29.40 | -5.90 | 37.20 | -17.60 | 61.00 | 78.00 | 3.30  | 91.80  |
| <i>A. melanandra</i>                  | Tetraploid GTM | 1606.00 | 2100    | 29.12 | -6.18 | 36.92 | -17.88 | 61.00 | 78.00 | 3.30  | 91.80  |
| <i>A. arguta</i> var. <i>arguta</i>   | Tetraploid GTM | 1603.00 | 2100    | 29.14 | -6.16 | 36.94 | -17.86 | 61.00 | 78.00 | 3.30  | 91.80  |
| <i>A. melanandra</i>                  | Tetraploid GHM | 1400.00 | 2100    | 29.40 | -4.00 | 37.80 | -16.40 | 67.00 | 85.00 | 5.60  | 133.70 |
| <i>A. melanandra</i>                  | Tetraploid GHM | 1460.00 | 2100    | 29.04 | -4.36 | 37.44 | -16.76 | 67.00 | 85.00 | 5.60  | 133.70 |
| <i>A. melanandra</i>                  | Tetraploid GHM | 1520.00 | 2100    | 28.68 | -4.72 | 37.08 | -17.12 | 67.00 | 85.00 | 5.60  | 133.70 |
| <i>A. arguta</i> var. <i>giraldii</i> | Decaploid GHM  | 1455.00 | 1726.4  | 29.07 | -4.33 | 37.47 | -16.73 | 67.00 | 85.00 | 5.60  | 133.70 |
| <i>A. arguta</i> var. <i>giraldii</i> | Decaploid GHM  | 1463.67 | 1726.4  | 29.02 | -4.38 | 37.42 | -16.78 | 67.00 | 85.00 | 5.60  | 133.70 |
| <i>A. arguta</i> var. <i>giraldii</i> | Decaploid GHM  | 1472.33 | 1726.4  | 28.97 | -4.43 | 37.37 | -16.83 | 67.00 | 85.00 | 5.60  | 133.70 |
| <i>A. arguta</i> var. <i>giraldii</i> | Decaploid GHM  | 1481.00 | 1726.4  | 28.91 | -4.49 | 37.31 | -16.89 | 67.00 | 85.00 | 5.60  | 133.70 |

---

Supplement Table 2 The agronomic trait and ploidy data of *A. arguta* var. *arguta*, *A. arguta* var. *giraldii* and *A. melanana*

| Species                             | Ploidy levels | Leaf length<br>(mm) | Leaf width<br>(mm) | Petiole<br>length<br>(mm) | Flower<br>diameter<br>(mm) | Fruit<br>length<br>(mm) | Fruit greater<br>diameter<br>(mm) | Fruit Lesser<br>diameter<br>(mm) | Fruit<br>weight<br>(g) | Soluble<br>solids<br>content (%) |
|-------------------------------------|---------------|---------------------|--------------------|---------------------------|----------------------------|-------------------------|-----------------------------------|----------------------------------|------------------------|----------------------------------|
| <i>A. arguta</i> var. <i>arguta</i> | Tetraploid    | 91.49               | 36.5               | 45.36                     | 18                         | 23.56                   | 20.03                             | 17.01                            | 4.28                   | 13.6                             |
| <i>A. arguta</i> var. <i>arguta</i> | Tetraploid    | 94.63               | 55.95              | 44.77                     | 18.1                       | 24.8                    | 22.3                              | 19.07                            | 5.86                   | 14.5                             |
| <i>A. arguta</i> var. <i>arguta</i> | Tetraploid    | 99.34               | 55.16              | 42.39                     | 18.2                       | 25.52                   | 14.73                             | 15.46                            | 3.11                   | 16.4                             |
| <i>A. arguta</i> var. <i>arguta</i> | Tetraploid    | 85.08               | 33.95              | 42.18                     | 16.9                       | 21.91                   | 19.63                             | 15.82                            | 3.99                   | 13.4                             |
| <i>A. arguta</i> var. <i>arguta</i> | Tetraploid    | 88                  | 52.03              | 41.63                     | 22.8                       | 23.07                   | 20.74                             | 16.73                            | 5.45                   | 16.2                             |
| <i>A. arguta</i> var. <i>arguta</i> | Tetraploid    | 92.38               | 51.29              | 39.42                     | 18.5                       | 23.73                   | 13.7                              | 13.45                            | 2.9                    | 15.3                             |
| <i>A. arguta</i> var. <i>arguta</i> | Tetraploid    | 82.57               | 53.5               | 34.08                     | 18.6                       | 17.35                   | 16.13                             | 14.52                            | 2.63                   | 14.5                             |
| <i>A. arguta</i> var. <i>arguta</i> | Tetraploid    | 72.21               | 47.23              | 35.55                     | 17.5                       | 20.26                   | 16.52                             | 16.55                            | 3.97                   | 13.2                             |
| <i>A. arguta</i> var. <i>arguta</i> | Tetraploid    | 82.89               | 49.9               | 30.58                     | 20.7                       | 28.4                    | 18.67                             | 16.23                            | 4.8                    | 13.7                             |
| <i>A. arguta</i> var. <i>arguta</i> | Tetraploid    | 95.22               | 54.52              | 29.02                     | 18.8                       | 25.32                   | 19.18                             | 16.5                             | 5.4                    | 13.62                            |
| <i>A. arguta</i> var. <i>arguta</i> | Tetraploid    | 110.83              | 52.59              | 56.37                     | 18.9                       | 20.35                   | 17.35                             | 16.22                            | 3.5                    | 14.52                            |
| <i>A. arguta</i> var. <i>arguta</i> | Tetraploid    | 104.26              | 64.85              | 49.27                     | 20.3                       | 35.53                   | 15.34                             | 14.88                            | 4.78                   | 16.42                            |
| <i>A. arguta</i> var. <i>arguta</i> | Tetraploid    | 107.81              | 69.09              | 58.67                     | 19.1                       | 32.87                   | 14.72                             | 14.4                             | 4.13                   | 18.52                            |
| <i>A. arguta</i> var. <i>arguta</i> | Tetraploid    | 102.43              | 65.68              | 47.06                     | 24.3                       | 33.64                   | 20.2                              | 18.87                            | 8.22                   | 12.41                            |
| <i>A. arguta</i> var. <i>arguta</i> | Tetraploid    | 79.79               | 53.69              | 35.46                     | 17.8                       | 18.19                   | 14.8                              | 13.82                            | 2.44                   | 9.91                             |
| <i>A. arguta</i> var. <i>arguta</i> | Tetraploid    | 88                  | 53.59              | 43.84                     | 17.9                       | 34.26                   | 19.13                             | 18.02                            | 7.21                   | 9.71                             |
| <i>A. arguta</i> var. <i>arguta</i> | Tetraploid    | 101.73              | 61.95              | 52.68                     | 18                         | 39.61                   | 22.11                             | 20.84                            | 8.34                   | 13.63                            |
| <i>A. arguta</i> var. <i>arguta</i> | Tetraploid    | 87.48               | 42.55              | 42.37                     | 17.5                       | 28.53                   | 19.33                             | 17.98                            | 5                      | 14.53                            |
| <i>A. arguta</i> var. <i>arguta</i> | Tetraploid    | 91.47               | 36.49              | 45.35                     | 18.2                       | 23.55                   | 20.03                             | 17.01                            | 4.28                   | 16.44                            |
| <i>A. arguta</i> var. <i>arguta</i> | Tetraploid    | 94.6                | 55.93              | 44.76                     | 18.3                       | 24.8                    | 22.29                             | 19.05                            | 5.86                   | 18.54                            |
| <i>A. arguta</i> var. <i>arguta</i> | Tetraploid    | 95.15               | 37.97              | 47.17                     | 18.4                       | 24.51                   | 20.84                             | 17.69                            | 4.45                   | 12.43                            |
| <i>A. arguta</i> var. <i>arguta</i> | Tetraploid    | 98.41               | 58.18              | 46.56                     | 18.3                       | 25.8                    | 23.19                             | 19.82                            | 6.09                   | 9.92                             |
| <i>A. arguta</i> var. <i>arguta</i> | Tetraploid    | 103.31              | 36.49              | 44.08                     | 18.6                       | 26.53                   | 15.32                             | 15.04                            | 3.23                   | 9.72                             |
| <i>A. arguta</i> var. <i>arguta</i> | Tetraploid    | 92.33               | 58.38              | 38.11                     | 19.6                       | 19.39                   | 18.05                             | 16.25                            | 2.94                   | 14.23                            |
| <i>A. arguta</i> var. <i>arguta</i> | Tetraploid    | 80.76               | 52.82              | 39.76                     | 18.7                       | 24.89                   | 18.48                             | 17.39                            | 4.34                   | 15.24                            |
| <i>A. arguta</i> var. <i>arguta</i> | Tetraploid    | 92.7                | 57.36              | 34.19                     | 20.1                       | 31.76                   | 19.77                             | 18.14                            | 5.37                   | 15.12                            |
| <i>A. arguta</i> var. <i>arguta</i> | Tetraploid    | 106.48              | 59.83              | 39.44                     | 18.9                       | 28.31                   | 21.44                             | 18.46                            | 6.04                   | 14.33                            |
| <i>A. arguta</i> var. <i>arguta</i> | Tetraploid    | 123.94              | 58.81              | 63.03                     | 24.1                       | 22.76                   | 19.4                              | 18.14                            | 3.91                   | 13.04                            |
| <i>A. arguta</i> var. <i>arguta</i> | Tetraploid    | 116.58              | 72.52              | 55.1                      | 18.5                       | 39.74                   | 17.16                             | 16.64                            | 5.34                   | 13.54                            |
| <i>A. arguta</i> var. <i>arguta</i> | Tetraploid    | 82.89               | 77.27              | 65.61                     | 17.7                       | 36.75                   | 16.47                             | 16.1                             | 4.61                   | 13.46                            |

|                                       |            |        |       |       |      |       |       |       |      |       |
|---------------------------------------|------------|--------|-------|-------|------|-------|-------|-------|------|-------|
| <i>A. arguta</i> var. <i>arguta</i>   | Tetraploid | 95.22  | 73.45 | 52.63 | 19.7 | 37.62 | 22.59 | 21.09 | 9.19 | 14.35 |
| <i>A. arguta</i> var. <i>arguta</i>   | Tetraploid | 75.68  | 36.81 | 36.66 | 17.3 | 24.68 | 16.72 | 15.55 | 4.33 | 14.22 |
| <i>A. arguta</i> var. <i>arguta</i>   | Tetraploid | 88.78  | 57.53 | 36.64 | 18   | 18.65 | 17.35 | 15.62 | 2.82 | 18.5  |
| <i>A. arguta</i> var. <i>arguta</i>   | Tetraploid | 77.65  | 50.79 | 38.22 | 18.4 | 23.93 | 17.77 | 16.73 | 4.17 | 12.4  |
| <i>A. arguta</i> var. <i>arguta</i>   | Tetraploid | 89.14  | 53.66 | 32.88 | 18.5 | 30.54 | 19.01 | 17.45 | 5.16 | 9.9   |
| <i>A. arguta</i> var. <i>arguta</i>   | Tetraploid | 102.38 | 58.63 | 31.19 | 18.6 | 27.23 | 20.62 | 17.74 | 5.81 | 9.7   |
| <i>A. arguta</i> var. <i>arguta</i>   | Tetraploid | 119.17 | 56.54 | 60.61 | 18.1 | 21.88 | 18.65 | 17.44 | 3.76 | 14.2  |
| <i>A. arguta</i> var. <i>arguta</i>   | Tetraploid | 112.1  | 69.73 | 52.98 | 18.7 | 38.21 | 16.5  | 16    | 5.13 | 15.2  |
| <i>A. arguta</i> var. <i>arguta</i>   | Tetraploid | 115.93 | 74.29 | 63.08 | 21.8 | 35.34 | 15.83 | 15.48 | 4.43 | 14.3  |
| <i>A. arguta</i> var. <i>arguta</i>   | Tetraploid | 110.14 | 70.62 | 50.61 | 18.9 | 36.17 | 22.73 | 20.28 | 8.83 | 13.3  |
| <i>A. arguta</i> var. <i>arguta</i>   | Tetraploid | 85.79  | 57.73 | 38.12 | 17.9 | 19.55 | 15.92 | 14.87 | 2.63 | 12.4  |
| <i>A. arguta</i> var. <i>arguta</i>   | Tetraploid | 94.63  | 57.63 | 49.14 | 19.1 | 32.84 | 20.58 | 19.38 | 7.76 | 12.5  |
| <i>A. arguta</i> var. <i>arguta</i>   | Tetraploid | 81.38  | 39.58 | 39.41 | 19.2 | 26.53 | 17.98 | 16.73 | 4.65 | 14.5  |
| <i>A. arguta</i> var. <i>arguta</i>   | Tetraploid | 98.34  | 39.24 | 48.76 | 19.3 | 25.33 | 21.54 | 18.28 | 4.61 | 15.22 |
| <i>A. arguta</i> var. <i>arguta</i>   | Tetraploid | 101.73 | 60.14 | 48.12 | 20.7 | 26.66 | 23.97 | 20.49 | 6.3  | 14.32 |
| <i>A. arguta</i> var. <i>arguta</i>   | Tetraploid | 106.79 | 59.29 | 45.57 | 19.5 | 27.43 | 15.84 | 15.55 | 3.35 | 13.32 |
| <i>A. arguta</i> var. <i>arguta</i>   | Tetraploid | 95.44  | 61.85 | 39.39 | 23.8 | 20.04 | 18.65 | 16.79 | 3.03 | 12.41 |
| <i>A. arguta</i> var. <i>arguta</i>   | Tetraploid | 83.47  | 54.59 | 41.09 | 18.2 | 25.73 | 19.09 | 17.98 | 4.48 | 12.52 |
| <i>A. arguta</i> var. <i>arguta</i>   | Tetraploid | 95.82  | 57.69 | 35.34 | 20.8 | 32.83 | 20.43 | 18.75 | 5.54 | 14.52 |
| <i>A. arguta</i> var. <i>arguta</i>   | Tetraploid | 110.06 | 63.02 | 33.54 | 18.4 | 29.26 | 22.16 | 19.08 | 6.24 | 13.42 |
| <i>A. arguta</i> var. <i>arguta</i>   | Tetraploid | 128.1  | 60.78 | 65.15 | 22.8 | 23.53 | 20.04 | 18.75 | 4.04 | 16.22 |
| <i>A. arguta</i> var. <i>arguta</i>   | Tetraploid | 120.51 | 74.97 | 56.95 | 18.6 | 41.08 | 17.73 | 17.2  | 5.52 | 15.32 |
| <i>A. arguta</i> var. <i>arguta</i>   | Tetraploid | 124.63 | 79.87 | 67.82 | 21.6 | 37.99 | 17.02 | 16.65 | 4.77 | 14.52 |
| <i>A. arguta</i> var. <i>arguta</i>   | Tetraploid | 118.4  | 75.93 | 54.4  | 18.7 | 38.88 | 23.36 | 21.8  | 9.5  | 13.22 |
| <i>A. arguta</i> var. <i>arguta</i>   | Tetraploid | 92.23  | 62.06 | 40.99 | 17.7 | 21.02 | 17.11 | 15.99 | 2.81 | 13.72 |
| <i>A. arguta</i> var. <i>arguta</i>   | Tetraploid | 87.96  | 35.1  | 43.61 | 18.9 | 22.66 | 18.26 | 16.35 | 4.12 | 16.23 |
| <i>A. arguta</i> var. <i>arguta</i>   | Tetraploid | 90.98  | 53.79 | 43.05 | 19   | 25.85 | 21.44 | 18.33 | 5.64 | 18.3  |
| <i>A. arguta</i> var. <i>arguta</i>   | Tetraploid | 95.51  | 53.03 | 40.76 | 19.1 | 24.54 | 14.17 | 13.9  | 2.99 | 12.27 |
| <i>A. arguta</i> var. <i>arguta</i>   | Tetraploid | 85.37  | 55.31 | 35.23 | 20.5 | 17.93 | 16.68 | 15.02 | 2.72 | 9.79  |
| <i>A. arguta</i> var. <i>arguta</i>   | Tetraploid | 74.66  | 48.84 | 36.76 | 19.3 | 23.01 | 17.08 | 16.08 | 4.01 | 9.6   |
| <i>A. arguta</i> var. <i>arguta</i>   | Tetraploid | 85.7   | 51.6  | 31.61 | 24.5 | 29.37 | 18.28 | 16.77 | 4.96 | 14.05 |
| <i>A. arguta</i> var. <i>arguta</i>   | Tetraploid | 120.1  | 56.36 | 30    | 20.8 | 26.18 | 19.82 | 17.06 | 5.59 | 15.04 |
| <i>A. arguta</i> var. <i>arguta</i>   | Tetraploid | 102.83 | 54.37 | 58.28 | 18.1 | 21.04 | 17.93 | 16.77 | 4.61 | 14.92 |
| <i>A. arguta</i> var. <i>arguta</i>   | Tetraploid | 107.79 | 67.05 | 50.95 | 19.1 | 36.74 | 15.86 | 15.39 | 4.94 | 14.14 |
| <i>A. arguta</i> var. <i>giraldii</i> | Octaploid  | 106.26 | 68.81 | 51.65 | 20   | 23.92 | 12.78 | 11.96 | 1.91 | 11.9  |

|                                       |            |        |        |       |      |       |             |      |      |
|---------------------------------------|------------|--------|--------|-------|------|-------|-------------|------|------|
| <i>A. arguta</i> var. <i>giraldii</i> | Octaploid  | 101.99 | 57.01  | 51.12 | 20.2 | 24.59 | 12.56 11.65 | 1.97 | 11.9 |
| <i>A. arguta</i> var. <i>giraldii</i> | Octaploid  | 129.4  | 82.9   | 75.55 | 21.4 | 33.03 | 13.98 14.19 | 3.37 | 13   |
| <i>A. arguta</i> var. <i>giraldii</i> | Octaploid  | 120.1  | 73.66  | 43.75 | 20.5 | 34.6  | 10.73 11.02 | 1.98 | 12.8 |
| <i>A. arguta</i> var. <i>giraldii</i> | Octaploid  | 102.83 | 59.85  | 53.76 | 18.6 | 36.82 | 13.09 12.95 | 2.91 | 12.8 |
| <i>A. arguta</i> var. <i>giraldii</i> | Octaploid  | 102.1  | 66.6   | 37.42 | 18.6 | 24.35 | 13.3 13.28  | 1.71 | 12.1 |
| <i>A. arguta</i> var. <i>giraldii</i> | Octaploid  | 111.67 | 93.26  | 66.3  | 20.8 | 26.27 | 12.43 12.55 | 1.64 | 15   |
| <i>A. arguta</i> var. <i>giraldii</i> | Octaploid  | 118.87 | 76.34  | 64.94 | 19.3 | 35.52 | 14.27 14.23 | 3.76 | 15.1 |
| <i>A. arguta</i> var. <i>giraldii</i> | Octaploid  | 112.94 | 72.57  | 52.1  | 21.2 | 36.35 | 19.58 18.64 | 7.49 | 14.8 |
| <i>A. arguta</i> var. <i>giraldii</i> | Octaploid  | 86.73  | 34.67  | 43.17 | 20.4 | 21.89 | 16.7 14.45  | 3.36 | 14.8 |
| <i>A. arguta</i> var. <i>giraldii</i> | Octaploid  | 89.71  | 53.15  | 42.61 | 20.6 | 23.05 | 18.59 16.2  | 4.59 | 14.8 |
| <i>A. arguta</i> var. <i>giraldii</i> | Octaploid  | 94.18  | 52.39  | 43.34 | 20.8 | 23.71 | 12.28 13.3  | 2.44 | 15.4 |
| <i>A. arguta</i> var. <i>giraldii</i> | Octaploid  | 84.17  | 54.65  | 34.88 | 20.9 | 17.33 | 14.46 13.27 | 2.22 | 15.1 |
| <i>A. arguta</i> var. <i>giraldii</i> | Octaploid  | 101.68 | 54.65  | 36.38 | 18.8 | 22.24 | 14.81 14.22 | 3.27 | 13   |
| <i>A. arguta</i> var. <i>giraldii</i> | Octaploid  | 129.01 | 48.24  | 55.54 | 18.9 | 25.71 | 13.74 12.85 | 2.05 | 12.8 |
| <i>A. arguta</i> var. <i>giraldii</i> | Octaploid  | 109.67 | 73.99  | 54.97 | 21.2 | 26.44 | 13.5 12.53  | 2.12 | 12.3 |
| <i>A. arguta</i> var. <i>giraldii</i> | Octaploid  | 139.14 | 89.14  | 81.23 | 19.7 | 35.52 | 15.04 15.25 | 3.62 | 12.1 |
| <i>A. arguta</i> var. <i>giraldii</i> | Decaploid  | 129.14 | 79.2   | 47.03 | 18.6 | 37.2  | 11.54 11.86 | 2.14 | 15   |
| <i>A. arguta</i> var. <i>giraldii</i> | Decaploid  | 110.56 | 64.35  | 55.81 | 18.6 | 39.6  | 14.08 12.93 | 3.12 | 15.1 |
| <i>A. arguta</i> var. <i>giraldii</i> | Decaploid  | 109.77 | 71.61  | 40.23 | 21.1 | 36.18 | 13.23 13.2  | 1.84 | 14.8 |
| <i>A. arguta</i> var. <i>giraldii</i> | Decaploid  | 120.07 | 100.27 | 71.3  | 18.3 | 28.26 | 13.36 13.48 | 4.76 | 10.2 |
| <i>A. arguta</i> var. <i>giraldii</i> | Decaploid  | 105.93 | 68.61  | 51.5  | 22.2 | 23.85 | 12.75 11.92 | 1.9  | 12   |
| <i>A. arguta</i> var. <i>giraldii</i> | Decaploid  | 101.68 | 56.84  | 50.98 | 19.2 | 34.52 | 12.52 11.61 | 1.96 | 10   |
| <i>A. arguta</i> var. <i>giraldii</i> | Decaploid  | 129.01 | 82.65  | 75.32 | 19.8 | 32.94 | 13.94 14.15 | 3.36 | 10   |
| <i>A. arguta</i> var. <i>giraldii</i> | Decaploid  | 119.73 | 73.43  | 43.62 | 22.6 | 34.5  | 10.7 11.99  | 3.98 | 9.7  |
| <i>A. arguta</i> var. <i>giraldii</i> | Decaploid  | 102.51 | 59.68  | 53.6  | 20.1 | 36.72 | 13.25 12.91 | 2.9  | 9    |
| <i>A. arguta</i> var. <i>giraldii</i> | Decaploid  | 101.79 | 66.4   | 37.31 | 18.8 | 24.28 | 12.27 12.23 | 3.7  | 12.1 |
| <i>A. arguta</i> var. <i>giraldii</i> | Decaploid  | 111.33 | 92.98  | 66.1  | 18.9 | 26.2  | 12.38 12.51 | 1.64 | 12.4 |
| <i>A. melanandra</i>                  | Tetraploid | 79.14  | 37.27  | 31.22 | 18.6 | 35.88 | 22.88 19.17 | 8.55 | 12.5 |
| <i>A. melanandra</i>                  | Tetraploid | 92.22  | 46.58  | 28.08 | 18.6 | 27.08 | 18.3 16.58  | 5.31 | 13   |
| <i>A. melanandra</i>                  | Tetraploid | 86.75  | 36.37  | 29.8  | 18.7 | 34.56 | 17.05 15.42 | 4.94 | 13.8 |
| <i>A. melanandra</i>                  | Tetraploid | 102.12 | 73.25  | 43.15 | 17.9 | 36.83 | 21.6 19.99  | 7.94 | 17.6 |
| <i>A. melanandra</i>                  | Tetraploid | 96.54  | 45.21  | 36.91 | 16.6 | 29.3  | 19.25 18.61 | 4.24 | 14.3 |
| <i>A. melanandra</i>                  | Tetraploid | 75.05  | 38.68  | 43.95 | 17.1 | 23.97 | 24.31 22.62 | 7.36 | 9.8  |
| <i>A. melanandra</i>                  | Tetraploid | 84.05  | 42.7   | 54.27 | 19.1 | 24.48 | 26.09 23.4  | 8.27 | 10.4 |
| <i>A. melanandra</i>                  | Tetraploid | 67.46  | 32.45  | 18.35 | 19.1 | 30.93 | 21.41 20.18 | 7.8  | 15.3 |
| <i>A. melanandra</i>                  | Tetraploid | 80.68  | 43.4   | 36.81 | 16.8 | 28.15 | 20.48 19.18 | 6.54 | 13.2 |

|                      |            |        |       |       |      |       |       |       |      |       |
|----------------------|------------|--------|-------|-------|------|-------|-------|-------|------|-------|
| <i>A. melanandra</i> | Tetraploid | 94.97  | 39.58 | 36.91 | 19.4 | 29.03 | 20.68 | 19.14 | 6.64 | 14.6  |
| <i>A. melanandra</i> | Tetraploid | 114.94 | 50.33 | 57.53 | 17.7 | 26.12 | 24.3  | 22.03 | 7.91 | 13.2  |
| <i>A. melanandra</i> | Tetraploid | 109.44 | 51.34 | 44.61 | 19.6 | 27.86 | 19.28 | 19.23 | 4.9  | 12.5  |
| <i>A. melanandra</i> | Tetraploid | 73.6   | 34.65 | 29.04 | 19.3 | 33.36 | 21.27 | 18.82 | 7.95 | 13.06 |
| <i>A. melanandra</i> | Tetraploid | 85.76  | 43.32 | 26.12 | 22.4 | 25.18 | 17.01 | 15.42 | 4.95 | 13.59 |
| <i>A. melanandra</i> | Tetraploid | 80.68  | 33.82 | 27.72 | 19.5 | 32.13 | 15.85 | 14.34 | 4.59 | 14.42 |
| <i>A. melanandra</i> | Tetraploid | 94.97  | 68.12 | 40.13 | 21.6 | 34.25 | 20.08 | 18.59 | 7.38 | 18.39 |
| <i>A. melanandra</i> | Tetraploid | 89.79  | 42.04 | 34.32 | 19.4 | 29.25 | 17.9  | 18.31 | 3.95 | 14.94 |
| <i>A. melanandra</i> | Tetraploid | 69.8   | 35.97 | 51.57 | 18.8 | 22.3  | 22.6  | 21.03 | 6.85 | 10.24 |
| <i>A. melanandra</i> | Tetraploid | 78.17  | 39.71 | 50.48 | 21.7 | 22.76 | 24.26 | 21.76 | 7.7  | 10.87 |
| <i>A. melanandra</i> | Tetraploid | 79.94  | 41.19 | 36.15 | 17.3 | 25.54 | 25.88 | 24.09 | 7.83 | 15.99 |
| <i>A. melanandra</i> | Tetraploid | 89.51  | 45.47 | 47.81 | 20.3 | 29.07 | 26.79 | 24.92 | 8.82 | 13.79 |
| <i>A. melanandra</i> | Tetraploid | 71.84  | 34.56 | 19.55 | 19.2 | 32.95 | 22.8  | 21.49 | 8.31 | 15.26 |
| <i>A. melanandra</i> | Tetraploid | 85.37  | 46.23 | 39.2  | 19.8 | 29.98 | 21.81 | 20.42 | 6.96 | 13.79 |
| <i>A. melanandra</i> | Tetraploid | 89.09  | 42.15 | 39.3  | 19.3 | 31.91 | 22.03 | 20.38 | 7.07 | 13.06 |
| <i>A. melanandra</i> | Tetraploid | 122.41 | 53.6  | 61.27 | 20   | 27.83 | 25.87 | 23.46 | 8.42 | 13.2  |
| <i>A. melanandra</i> | Tetraploid | 116.54 | 54.67 | 47.5  | 23.1 | 29.66 | 20.53 | 17.28 | 5.22 | 15.5  |
| <i>A. melanandra</i> | Tetraploid | 83.19  | 42.02 | 25.33 | 18.3 | 24.42 | 16.51 | 14.96 | 4.8  | 13.18 |



*tra*

| Ascorbic acid content(mg/100g fresh weight) | Total sugar content (g/100g fresh weight) | Total acid (g/100g fresh weight) | Total amino acid content (g/100g fresh weight) | Asparagine (g/100g fresh weight)) | Threonine (g/100g fresh weight) | Serine (g/100g fresh weight) | Glutamic acid (g/100g fresh weight) | Proline (g/100g fresh weight) | Glycine (g/100g fresh weight) | Alanine (g/100g fresh weight) | Cystine (g/100g fresh weight) |
|---------------------------------------------|-------------------------------------------|----------------------------------|------------------------------------------------|-----------------------------------|---------------------------------|------------------------------|-------------------------------------|-------------------------------|-------------------------------|-------------------------------|-------------------------------|
| 26.99                                       | 8.16                                      | 0.78                             | 0.7539                                         | 0.094                             | 0.0434                          | 0.0408                       | 0.0984                              | 0.068                         | 0.0466                        | 0.0445                        | 0.0093                        |
| 52.3                                        | 8.35                                      | 1.07                             | 0.86                                           | 0.0971                            | 0.0457                          | 0.0428                       | 0.139                               | 0.0768                        | 0.0515                        | 0.055                         | 0.0113                        |
| 52.58                                       | 8.62                                      | 1.21                             | 1.1449                                         | 0.1389                            | 0.0492                          | 0.0550                       | 0.1653                              | 0.088                         | 0.0587                        | 0.0707                        | 0.0146                        |
| 25.1                                        | 7.59                                      | 0.72                             | 0.701                                          | 0.0874                            | 0.0404                          | 0.0379                       | 0.0915                              | 0.0633                        | 0.0433                        | 0.0414                        | 0.0087                        |
| 48.63                                       | 7.78                                      | 0.99                             | 0.7998                                         | 0.0903                            | 0.0425                          | 0.0398                       | 0.1293                              | 0.0714                        | 0.0479                        | 0.0512                        | 0.0105                        |
| 48.9                                        | 7.09                                      | 1.12                             | 1.0647                                         | 0.1292                            | 0.0457                          | 0.0511                       | 0.1537                              | 0.0819                        | 0.0546                        | 0.0657                        | 0.0135                        |
| 45.28                                       | 8.17                                      | 0.83                             | 0.766                                          | 0.0952                            | 0.0467                          | 0.0425                       | 0.0986                              | 0.0643                        | 0.0511                        | 0.0458                        | 0.0132                        |
| 16.43                                       | 5.1                                       | 1.3                              | 0.7379                                         | 0.0832                            | 0.0382                          | 0.0376                       | 0.1144                              | 0.0693                        | 0.0445                        | 0.0456                        | 0.0102                        |
| 51.99                                       | 7.53                                      | 1.1                              | 0.5493                                         | 0.0629                            | 0.0399                          | 0.0327                       | 0.0761                              | 0.0557                        | 0.0409                        | 0.0337                        | 0.0091                        |
| 81.18                                       | 8.86                                      | 1.23                             | 0.6593                                         | 0.0767                            | 0.038                           | 0.0362                       | 0.0929                              | 0.0595                        | 0.0409                        | 0.0416                        | 0.0084                        |
| 56.8                                        | 10.59                                     | 0.9                              | 1.014                                          | 0.1129                            | 0.056                           | 0.0530                       | 0.1414                              | 0.0831                        | 0.0602                        | 0.0702                        | 0.017                         |
| 54.62                                       | 10.18                                     | 0.86                             | 0.9749                                         | 0.1085                            | 0.0538                          | 0.0510                       | 0.1359                              | 0.0799                        | 0.0579                        | 0.0675                        | 0.0164                        |
| 23.01                                       | 6.95                                      | 1.27                             | 0.977                                          | 0.1083                            | 0.047                           | 0.0505                       | 0.1742                              | 0.0888                        | 0.0528                        | 0.0712                        | 0.0167                        |
| 54.6                                        | 7.67                                      | 1.15                             | 0.9868                                         | 0.1175                            | 0.0475                          | 0.0695                       | 0.1552                              | 0.0821                        | 0.0535                        | 0.0612                        | 0.0133                        |
| 68.19                                       | 7.17                                      | 1.18                             | 1.22                                           | 0.1496                            | 0.0546                          | 0.0565                       | 0.1763                              | 0.0905                        | 0.0597                        | 0.0699                        | 0.0155                        |
| 52.06                                       | 8.77                                      | 1.39                             | 1.0321                                         | 0.1236                            | 0.0522                          | 0.0542                       | 0.1741                              | 0.092                         | 0.058                         | 0.0683                        | 0.0152                        |
| 60.18                                       | 10.14                                     | 1.6                              | 1.193                                          | 0.1429                            | 0.0604                          | 0.0627                       | 0.2012                              | 0.1062                        | 0.0671                        | 0.0789                        | 0.0176                        |
| 59.79                                       | 9.88                                      | 2.11                             | 1.0214                                         | 0.1055                            | 0.0506                          | 0.0532                       | 0.1634                              | 0.1006                        | 0.0581                        | 0.0604                        | 0.0142                        |
| 26.98                                       | 8.16                                      | 0.78                             | 0.7537                                         | 0.094                             | 0.0434                          | 0.0408                       | 0.0983                              | 0.068                         | 0.0466                        | 0.0445                        | 0.0093                        |
| 52.29                                       | 8.35                                      | 1.07                             | 0.8598                                         | 0.097                             | 0.0457                          | 0.0427                       | 0.139                               | 0.0768                        | 0.0515                        | 0.055                         | 0.0112                        |
| 28.07                                       | 8.48                                      | 0.81                             | 0.784                                          | 0.0978                            | 0.0452                          | 0.0424                       | 0.1022                              | 0.0707                        | 0.0485                        | 0.0463                        | 0.0097                        |
| 54.39                                       | 8.69                                      | 1.11                             | 0.8944                                         | 0.1008                            | 0.0475                          | 0.0445                       | 0.1446                              | 0.0799                        | 0.0535                        | 0.0572                        | 0.0117                        |
| 54.68                                       | 7.93                                      | 1.26                             | 1.1907                                         | 0.1445                            | 0.0512                          | 0.0572                       | 0.1718                              | 0.0916                        | 0.061                         | 0.0735                        | 0.0151                        |
| 61.81                                       | 9.13                                      | 0.93                             | 0.8566                                         | 0.1064                            | 0.0522                          | 0.0475                       | 0.1102                              | 0.0719                        | 0.0571                        | 0.0513                        | 0.0148                        |
| 18.37                                       | 5.71                                      | 1.34                             | 0.8252                                         | 0.0931                            | 0.0428                          | 0.0420                       | 0.1279                              | 0.0776                        | 0.0497                        | 0.051                         | 0.0114                        |
| 58.15                                       | 8.41                                      | 1.19                             | 0.7142                                         | 0.0704                            | 0.0446                          | 0.0365                       | 0.0851                              | 0.0623                        | 0.0458                        | 0.0377                        | 0.0102                        |
| 90.79                                       | 9.91                                      | 1.38                             | 0.7373                                         | 0.0857                            | 0.0425                          | 0.0405                       | 0.1038                              | 0.0666                        | 0.0457                        | 0.0466                        | 0.0094                        |
| 63.52                                       | 11.83                                     | 1                                | 1.1339                                         | 0.1262                            | 0.0626                          | 0.0593                       | 0.1581                              | 0.0929                        | 0.0674                        | 0.0785                        | 0.019                         |
| 61.07                                       | 11.39                                     | 0.96                             | 1.0903                                         | 0.1214                            | 0.0602                          | 0.0570                       | 0.152                               | 0.0894                        | 0.0648                        | 0.0755                        | 0.0183                        |
| 25.73                                       | 7.77                                      | 1.42                             | 1.0927                                         | 0.1212                            | 0.0526                          | 0.0565                       | 0.1948                              | 0.0994                        | 0.0591                        | 0.0797                        | 0.0187                        |

|        |       |      |        |        |        |        |        |        |        |        |        |
|--------|-------|------|--------|--------|--------|--------|--------|--------|--------|--------|--------|
| 61.05  | 8.57  | 1.29 | 1.1035 | 0.1314 | 0.0531 | 0.0777 | 0.1734 | 0.0918 | 0.0599 | 0.0685 | 0.0149 |
| 51.73  | 8.55  | 1.82 | 0.8836 | 0.0913 | 0.0438 | 0.0460 | 0.1413 | 0.0871 | 0.0502 | 0.0522 | 0.0123 |
| 59.44  | 8.78  | 0.89 | 0.8237 | 0.1023 | 0.0502 | 0.0457 | 0.1059 | 0.0691 | 0.0549 | 0.0493 | 0.0112 |
| 17.66  | 5.49  | 1.29 | 0.7934 | 0.0895 | 0.0411 | 0.0404 | 0.123  | 0.0746 | 0.0478 | 0.0491 | 0.0109 |
| 55.91  | 8.1   | 1.15 | 0.5906 | 0.0677 | 0.0429 | 0.0350 | 0.0818 | 0.0599 | 0.044  | 0.0362 | 0.0098 |
| 87.29  | 9.53  | 1.33 | 0.7089 | 0.0824 | 0.0408 | 0.0390 | 0.0999 | 0.064  | 0.044  | 0.0448 | 0.009  |
| 61.07  | 11.39 | 0.96 | 1.0903 | 0.1214 | 0.0602 | 0.0570 | 0.152  | 0.0894 | 0.0648 | 0.0755 | 0.0183 |
| 58.73  | 10.95 | 0.93 | 1.0483 | 0.1167 | 0.0579 | 0.0548 | 0.1462 | 0.0859 | 0.0623 | 0.0726 | 0.0176 |
| 24.75  | 7.47  | 1.37 | 1.0506 | 0.1165 | 0.0506 | 0.0543 | 0.1873 | 0.0955 | 0.0568 | 0.0766 | 0.018  |
| 58.71  | 8.25  | 1.24 | 1.0611 | 0.1263 | 0.0511 | 0.0747 | 0.1667 | 0.0883 | 0.0576 | 0.0658 | 0.0143 |
| 63.32  | 7.71  | 1.26 | 1.3118 | 0.1609 | 0.0587 | 0.0608 | 0.1896 | 0.0973 | 0.0642 | 0.0752 | 0.0166 |
| 55.97  | 9.43  | 1.49 | 1.1098 | 0.133  | 0.0562 | 0.0583 | 0.1872 | 0.0989 | 0.0624 | 0.0734 | 0.0164 |
| 55.62  | 9.19  | 1.96 | 0.9501 | 0.0982 | 0.0471 | 0.0495 | 0.152  | 0.0937 | 0.054  | 0.0561 | 0.0132 |
| 29.01  | 8.77  | 0.84 | 0.8104 | 0.1009 | 0.0467 | 0.0439 | 0.1056 | 0.0731 | 0.0501 | 0.0478 | 0.01   |
| 56.22  | 8.98  | 1.15 | 0.9245 | 0.1042 | 0.0491 | 0.0460 | 0.1495 | 0.0826 | 0.0553 | 0.0591 | 0.0121 |
| 56.53  | 8.2   | 1.3  | 1.2308 | 0.1493 | 0.0529 | 0.0591 | 0.1776 | 0.0947 | 0.0631 | 0.076  | 0.0156 |
| 63.89  | 9.44  | 0.96 | 0.8855 | 0.11   | 0.054  | 0.0492 | 0.1139 | 0.0743 | 0.059  | 0.053  | 0.0153 |
| 18.99  | 5.9   | 1.38 | 0.8529 | 0.0962 | 0.0442 | 0.0434 | 0.1322 | 0.0802 | 0.0514 | 0.0528 | 0.0118 |
| 60.11  | 8.7   | 1.23 | 0.6348 | 0.0727 | 0.0461 | 0.0377 | 0.088  | 0.0644 | 0.0473 | 0.039  | 0.0105 |
| 93.84  | 10.25 | 1.43 | 0.7622 | 0.0886 | 0.0439 | 0.0419 | 0.1073 | 0.0688 | 0.0473 | 0.0482 | 0.0097 |
| 65.65  | 12.23 | 1.04 | 1.172  | 0.1305 | 0.0647 | 0.0613 | 0.1635 | 0.0961 | 0.0697 | 0.0812 | 0.0197 |
| 63.14  | 11.76 | 1    | 1.127  | 0.1255 | 0.0622 | 0.0589 | 0.1572 | 0.0924 | 0.067  | 0.078  | 0.0189 |
| 26.6   | 8.04  | 1.47 | 1.1294 | 0.1252 | 0.0544 | 0.0584 | 0.2014 | 0.1026 | 0.0611 | 0.0823 | 0.0194 |
| 63.11  | 8.86  | 1.33 | 1.1407 | 0.1358 | 0.0549 | 0.0803 | 0.1793 | 0.0949 | 0.0619 | 0.0708 | 0.0154 |
| 78.81  | 8.29  | 1.36 | 1.4102 | 0.1729 | 0.0631 | 0.0654 | 0.2039 | 0.1045 | 0.069  | 0.0809 | 0.0179 |
| 25.95  | 7.85  | 0.75 | 0.7248 | 0.0904 | 0.0417 | 0.0392 | 0.0946 | 0.0654 | 0.0448 | 0.0428 | 0.0089 |
| 50.28  | 8.04  | 1.03 | 0.8269 | 0.0933 | 0.0439 | 0.0411 | 0.1337 | 0.0739 | 0.0495 | 0.0529 | 0.0108 |
| 50.56  | 7.33  | 1.16 | 1.1008 | 0.1335 | 0.0473 | 0.0529 | 0.1589 | 0.0846 | 0.0564 | 0.0679 | 0.014  |
| 57.15  | 8.44  | 0.86 | 0.792  | 0.0984 | 0.0483 | 0.0440 | 0.1018 | 0.0665 | 0.0528 | 0.0474 | 0.0137 |
| 16.99  | 5.28  | 1.24 | 0.7629 | 0.086  | 0.0395 | 0.0388 | 0.1182 | 0.0717 | 0.046  | 0.0472 | 0.0105 |
| 53.76  | 7.79  | 1.1  | 0.5678 | 0.065  | 0.0413 | 0.0337 | 0.0787 | 0.0576 | 0.0423 | 0.0348 | 0.0094 |
| 83.93  | 9.16  | 1.28 | 0.6817 | 0.0793 | 0.0392 | 0.0375 | 0.0961 | 0.0616 | 0.0423 | 0.0431 | 0.0087 |
| 58.72  | 10.95 | 0.93 | 1.0483 | 0.1167 | 0.0579 | 0.0548 | 0.1462 | 0.0859 | 0.0623 | 0.0726 | 0.0176 |
| 56.47  | 10.52 | 0.89 | 1.008  | 0.1122 | 0.0557 | 0.0527 | 0.1405 | 0.0826 | 0.0599 | 0.0698 | 0.0169 |
| 142.16 | 5     | 0.9  | 1.5292 | 0.1833 | 0.0748 | 0.0679 | 0.2417 | 0.121  | 0.0844 | 0.0847 | 0.0223 |

|        |       |      |         |        |        |        |        |        |        |        |        |
|--------|-------|------|---------|--------|--------|--------|--------|--------|--------|--------|--------|
| 102.66 | 5.38  | 0.9  | 1.7628  | 0.2606 | 0.0819 | 0.0705 | 0.2575 | 0.1236 | 0.0842 | 0.0912 | 0.0225 |
| 56.95  | 6.79  | 0.88 | 2.0423  | 0.4264 | 0.0962 | 0.0836 | 0.3143 | 0.128  | 0.0872 | 0.126  | 0.0263 |
| 95.55  | 6.06  | 0.97 | 1.8731  | 0.2265 | 0.072  | 0.0672 | 0.2084 | 0.0999 | 0.07   | 0.0847 | 0.0182 |
| 86.59  | 6.42  | 0.92 | 1.84914 | 0.326  | 0.0868 | 0.0728 | 0.2599 | 0.1219 | 0.0824 | 0.0969 | 0.0231 |
| 115.29 | 5.62  | 0.54 | 1.473   | 0.1814 | 0.0765 | 0.0650 | 0.2188 | 0.1132 | 0.0857 | 0.0832 | 0.0199 |
| 116.28 | 7.33  | 0.85 | 1.5793  | 0.189  | 0.075  | 0.0666 | 0.249  | 0.1224 | 0.084  | 0.0833 | 0.0214 |
| 25.23  | 10.47 | 1.24 | 1.2347  | 0.1353 | 0.0544 | 0.0557 | 0.1966 | 0.0966 | 0.0583 | 0.0815 | 0.0188 |
| 59.85  | 6.87  | 1.12 | 1.0945  | 0.1467 | 0.0549 | 0.0766 | 0.175  | 0.0893 | 0.0591 | 0.0701 | 0.0149 |
| 35.43  | 6.81  | 0.65 | 1.1894  | 0.1008 | 0.0432 | 0.0387 | 0.0954 | 0.0636 | 0.0442 | 0.0438 | 0.009  |
| 49.29  | 6.81  | 0.89 | 1.1079  | 0.1041 | 0.0454 | 0.0406 | 0.1349 | 0.0718 | 0.0488 | 0.0541 | 0.0109 |
| 49.56  | 11.29 | 1.01 | 1.2867  | 0.1491 | 0.0489 | 0.0522 | 0.1604 | 0.0823 | 0.0557 | 0.0695 | 0.0141 |
| 56.01  | 8.51  | 0.75 | 1.0113  | 0.1098 | 0.0499 | 0.0434 | 0.1028 | 0.0647 | 0.0521 | 0.0485 | 0.0137 |
| 16.65  | 6.49  | 1.07 | 1.1228  | 0.096  | 0.0409 | 0.0384 | 0.1193 | 0.0697 | 0.0454 | 0.0483 | 0.0106 |
| 152.85 | 6.03  | 0.97 | 1.8365  | 0.1971 | 0.0804 | 0.0730 | 0.2599 | 0.1301 | 0.0908 | 0.0911 | 0.024  |
| 110.38 | 5.97  | 0.96 | 1.8869  | 0.2802 | 0.078  | 0.0748 | 0.2769 | 0.1729 | 0.0906 | 0.088  | 0.0642 |
| 61.25  | 5.64  | 0.95 | 2.3555  | 0.4585 | 0.1034 | 0.0899 | 0.338  | 0.1376 | 0.0938 | 0.1355 | 0.0283 |
| 102.74 | 7.4   | 1.04 | 1.9709  | 0.2435 | 0.0775 | 0.0722 | 0.2241 | 0.1075 | 0.0752 | 0.0911 | 0.0196 |
| 93.11  | 10.5  | 0.99 | 1.9786  | 0.3506 | 0.0933 | 0.0783 | 0.2795 | 0.131  | 0.0886 | 0.1041 | 0.0248 |
| 123.97 | 7.04  | 0.58 | 1.5216  | 0.195  | 0.0822 | 0.0699 | 0.2352 | 0.1217 | 0.0922 | 0.0894 | 0.0214 |
| 125.03 | 4.99  | 0.91 | 1.6356  | 0.2032 | 0.0807 | 0.0716 | 0.2678 | 0.1316 | 0.0903 | 0.0895 | 0.023  |
| 141.73 | 5.54  | 0.9  | 1.5737  | 0.1828 | 0.0746 | 0.0677 | 0.241  | 0.1206 | 0.0842 | 0.0845 | 0.0222 |
| 102.34 | 3.31  | 0.89 | 1.8358  | 0.2598 | 0.0816 | 0.0703 | 0.2567 | 0.1232 | 0.084  | 0.0909 | 0.0225 |
| 56.78  | 4.63  | 0.88 | 2.1328  | 0.4251 | 0.0959 | 0.0834 | 0.3133 | 0.1276 | 0.087  | 0.1257 | 0.0262 |
| 95.25  | 3.07  | 0.97 | 1.9     | 0.2259 | 0.0718 | 0.0670 | 0.2078 | 0.0997 | 0.0698 | 0.0845 | 0.0182 |
| 86.33  | 3.06  | 0.92 | 1.9834  | 0.325  | 0.0865 | 0.0726 | 0.2591 | 0.1215 | 0.0822 | 0.0966 | 0.023  |
| 114.94 | 5.55  | 0.54 | 1.3871  | 0.1808 | 0.0762 | 0.0648 | 0.2181 | 0.1128 | 0.0855 | 0.0829 | 0.0198 |
| 115.93 | 6.02  | 0.84 | 1.5932  | 0.1884 | 0.0748 | 0.0664 | 0.2483 | 0.122  | 0.0838 | 0.083  | 0.0214 |
| 76.86  | 7.82  | 1.31 | 0.9289  | 0.099  | 0.0474 | 0.0487 | 0.1635 | 0.0835 | 0.053  | 0.0542 | 0.0139 |
| 80.21  | 7.87  | 1.08 | 1.0247  | 0.108  | 0.0519 | 0.0531 | 0.1762 | 0.0953 | 0.0572 | 0.0595 | 0.0153 |
| 80.18  | 8.65  | 0.78 | 1.0187  | 0.107  | 0.0527 | 0.0515 | 0.1643 | 0.0967 | 0.0575 | 0.0594 | 0.0145 |
| 73.87  | 10.43 | 0.91 | 1.0403  | 0.1095 | 0.0533 | 0.0532 | 0.1721 | 0.0984 | 0.0586 | 0.0607 | 0.015  |
| 78.75  | 8.76  | 1.27 | 0.8806  | 0.0925 | 0.0438 | 0.0464 | 0.1625 | 0.0774 | 0.0492 | 0.0524 | 0.0135 |
| 58.36  | 6.73  | 0.82 | 1.0377  | 0.1096 | 0.052  | 0.0550 | 0.1886 | 0.0936 | 0.0572 | 0.0599 | 0.0165 |
| 102.49 | 7.24  | 0.75 | 1.0057  | 0.1053 | 0.0525 | 0.0506 | 0.1603 | 0.0946 | 0.0566 | 0.0584 | 0.0146 |
| 62.32  | 9.45  | 1.33 | 0.7586  | 0.0779 | 0.0376 | 0.0400 | 0.1396 | 0.0641 | 0.0409 | 0.0478 | 0.0115 |
| 99.3   | 8.38  | 1.3  | 0.9761  | 0.1029 | 0.0488 | 0.0516 | 0.177  | 0.0879 | 0.0537 | 0.0562 | 0.0155 |

|        |       |      |        |        |        |        |        |        |        |        |        |
|--------|-------|------|--------|--------|--------|--------|--------|--------|--------|--------|--------|
| 75.51  | 9.01  | 1.37 | 1.0286 | 0.1093 | 0.0511 | 0.0540 | 0.1931 | 0.0908 | 0.0598 | 0.0604 | 0.0152 |
| 55.34  | 8.26  | 1.25 | 0.7765 | 0.0839 | 0.0421 | 0.0401 | 0.1193 | 0.0714 | 0.0452 | 0.0457 | 0.0108 |
| 98.81  | 7.69  | 1.06 | 0.9252 | 0.0983 | 0.0487 | 0.0480 | 0.1502 | 0.0892 | 0.0536 | 0.0553 | 0.0114 |
| 71.49  | 7.93  | 1.22 | 0.8639 | 0.092  | 0.0441 | 0.0452 | 0.1521 | 0.0777 | 0.0493 | 0.0504 | 0.0129 |
| 74.6   | 8.38  | 1    | 0.953  | 0.1004 | 0.0483 | 0.0494 | 0.1639 | 0.0887 | 0.0532 | 0.0554 | 0.0142 |
| 74.57  | 8.87  | 0.73 | 0.9474 | 0.0996 | 0.049  | 0.0479 | 0.1528 | 0.09   | 0.0535 | 0.0553 | 0.0135 |
| 68.7   | 10.72 | 0.84 | 0.9675 | 0.1016 | 0.0495 | 0.0491 | 0.1575 | 0.0925 | 0.0547 | 0.0565 | 0.0135 |
| 73.24  | 9.1   | 1.19 | 0.8189 | 0.086  | 0.0407 | 0.0431 | 0.1511 | 0.0719 | 0.0457 | 0.0487 | 0.0125 |
| 54.28  | 8.03  | 0.77 | 0.9652 | 0.1018 | 0.0495 | 0.0494 | 0.1601 | 0.0915 | 0.0545 | 0.0564 | 0.0139 |
| 95.32  | 7.49  | 0.7  | 0.9353 | 0.098  | 0.0488 | 0.0471 | 0.1491 | 0.0879 | 0.0526 | 0.0543 | 0.0136 |
| 62.16  | 10.06 | 0.88 | 1.1052 | 0.1164 | 0.0567 | 0.0562 | 0.1802 | 0.1058 | 0.0626 | 0.0648 | 0.0154 |
| 109.16 | 8.6   | 0.8  | 1.0711 | 0.1122 | 0.0559 | 0.0539 | 0.1706 | 0.1006 | 0.0603 | 0.0622 | 0.0155 |
| 77.02  | 9.3   | 1.42 | 0.8079 | 0.083  | 0.0401 | 0.0426 | 0.1487 | 0.0683 | 0.0436 | 0.0509 | 0.0122 |
| 105.76 | 8.51  | 1.38 | 1.0395 | 0.1093 | 0.0532 | 0.0528 | 0.1692 | 0.0995 | 0.0588 | 0.0608 | 0.0145 |
| 80.42  | 8     | 1.46 | 1.0955 | 0.1164 | 0.0544 | 0.0575 | 0.2057 | 0.0967 | 0.0637 | 0.0643 | 0.0162 |
| 58.93  | 8.32  | 1.33 | 0.827  | 0.0894 | 0.0448 | 0.0427 | 0.1271 | 0.0768 | 0.0481 | 0.0487 | 0.0115 |
| 105.23 | 9.79  | 1.13 | 0.9854 | 0.1046 | 0.0519 | 0.0511 | 0.1599 | 0.095  | 0.0571 | 0.0589 | 0.0121 |
| 72.37  | 8.23  | 0.97 | 0.9243 | 0.0975 | 0.0468 | 0.0479 | 0.159  | 0.086  | 0.0516 | 0.0517 | 0.0138 |

---

| Valine<br>(g/100g<br>fresh<br>weight) | Methionine<br>(g/100g<br>fresh<br>weight) | Isoleucine<br>(g/100g<br>fresh<br>weight) | Leucine<br>(g/100g<br>fresh<br>weight) | Tyrosine<br>(g/100g<br>fresh<br>weight) | Phenylala<br>nine<br>(g/100g<br>fresh<br>weight) | Lysine<br>(g/100g<br>fresh<br>weight) | Histidine<br>(g/100g<br>fresh<br>weight) | Arginine<br>(g/100g<br>fresh<br>weight) | Total<br>Anthocyanin<br>(mg/100g fresh<br>weight) |
|---------------------------------------|-------------------------------------------|-------------------------------------------|----------------------------------------|-----------------------------------------|--------------------------------------------------|---------------------------------------|------------------------------------------|-----------------------------------------|---------------------------------------------------|
| 0.0454                                | 0.005                                     | 0.0337                                    | 0.0558                                 | 0.0328                                  | 0.0264                                           | 0.0727                                | 0.0177                                   | 0.0357                                  |                                                   |
| 0.0504                                | 0.0052                                    | 0.0568                                    | 0.039                                  | 0.026                                   | 0.0311                                           | 0.0777                                | 0.0188                                   | 0.0542                                  |                                                   |
| 0.0576                                | 0.0054                                    | 0.0638                                    | 0.0461                                 | 0.0298                                  | 0.0361                                           | 0.0988                                | 0.0257                                   | 0.056                                   |                                                   |
| 0.0422                                | 0.0047                                    | 0.0314                                    | 0.0519                                 | 0.0305                                  | 0.0246                                           | 0.0676                                | 0.0164                                   | 0.0333                                  |                                                   |
| 0.0468                                | 0.0048                                    | 0.0528                                    | 0.0363                                 | 0.0242                                  | 0.0289                                           | 0.0722                                | 0.0175                                   | 0.0504                                  |                                                   |
| 0.0536                                | 0.005                                     | 0.0593                                    | 0.0428                                 | 0.0277                                  | 0.0335                                           | 0.0919                                | 0.0239                                   | 0.0521                                  |                                                   |
| 0.0455                                | 0.005                                     | 0.0487                                    | 0.0395                                 | 0.0362                                  | 0.0266                                           | 0.071                                 | 0.0167                                   | 0.0356                                  |                                                   |
| 0.0422                                | 0.0033                                    | 0.0497                                    | 0.0338                                 | 0.0235                                  | 0.0287                                           | 0.0639                                | 0.0173                                   | 0.0473                                  |                                                   |
| 0.0368                                | 0.004                                     | 0.0424                                    | 0.0312                                 | 0.0255                                  | 0.0237                                           | 0.0539                                | 0.013                                    | 0.0335                                  |                                                   |
| 0.0395                                | 0.0047                                    | 0.0456                                    | 0.0318                                 | 0.0158                                  | 0.0257                                           | 0.0648                                | 0.0158                                   | 0.0361                                  |                                                   |
| 0.059                                 | 0.0032                                    | 0.06                                      | 0.0494                                 | 0.0892                                  | 0.0297                                           | 0.0807                                | 0.022                                    | 0.0475                                  |                                                   |
| 0.0567                                | 0.0031                                    | 0.0577                                    | 0.0475                                 | 0.0858                                  | 0.0285                                           | 0.0776                                | 0.0212                                   | 0.0457                                  |                                                   |
| 0.0521                                | 0.0042                                    | 0.0612                                    | 0.0404                                 | 0.0269                                  | 0.0292                                           | 0.0848                                | 0.0235                                   | 0.0651                                  |                                                   |
| 0.0529                                | 0.0053                                    | 0.059                                     | 0.0415                                 | 0.0284                                  | 0.0334                                           | 0.088                                 | 0.0228                                   | 0.0528                                  |                                                   |
| 0.0596                                | 0.0054                                    | 0.0647                                    | 0.0474                                 | 0.1706                                  | 0.0364                                           | 0.1007                                | 0.0269                                   | 0.0617                                  |                                                   |
| 0.0571                                | 0.0061                                    | 0.0648                                    | 0.0447                                 | 0.0285                                  | 0.038                                            | 0.0992                                | 0.0261                                   | 0.0511                                  |                                                   |
| 0.066                                 | 0.0071                                    | 0.075                                     | 0.0517                                 | 0.0329                                  | 0.044                                            | 0.1146                                | 0.0301                                   | 0.0591                                  |                                                   |
| 0.0585                                | 0.0045                                    | 0.0755                                    | 0.0454                                 | 0.0255                                  | 0.0365                                           | 0.0925                                | 0.027                                    | 0.0717                                  |                                                   |
| 0.0454                                | 0.005                                     | 0.0337                                    | 0.0558                                 | 0.0328                                  | 0.0264                                           | 0.0727                                | 0.0177                                   | 0.0357                                  |                                                   |
| 0.0504                                | 0.0052                                    | 0.0568                                    | 0.039                                  | 0.026                                   | 0.0311                                           | 0.0777                                | 0.0188                                   | 0.0542                                  |                                                   |
| 0.0472                                | 0.0052                                    | 0.035                                     | 0.0581                                 | 0.034                                   | 0.0275                                           | 0.0756                                | 0.0184                                   | 0.0372                                  |                                                   |
| 0.0524                                | 0.0054                                    | 0.0591                                    | 0.0406                                 | 0.0271                                  | 0.0323                                           | 0.0808                                | 0.0196                                   | 0.0564                                  |                                                   |
| 0.06                                  | 0.0056                                    | 0.0663                                    | 0.0479                                 | 0.031                                   | 0.0375                                           | 0.1027                                | 0.0267                                   | 0.0583                                  |                                                   |
| 0.0509                                | 0.0056                                    | 0.0545                                    | 0.0442                                 | 0.0404                                  | 0.0298                                           | 0.0794                                | 0.0187                                   | 0.0399                                  |                                                   |
| 0.0472                                | 0.0037                                    | 0.0555                                    | 0.0378                                 | 0.0263                                  | 0.0321                                           | 0.0715                                | 0.0194                                   | 0.053                                   |                                                   |
| 0.0412                                | 0.0045                                    | 0.0474                                    | 0.0348                                 | 0.0285                                  | 0.0265                                           | 0.0603                                | 0.0145                                   | 0.0375                                  |                                                   |
| 0.0441                                | 0.0052                                    | 0.0511                                    | 0.0354                                 | 0.0177                                  | 0.0287                                           | 0.0725                                | 0.0176                                   | 0.0404                                  |                                                   |
| 0.066                                 | 0.0036                                    | 0.0671                                    | 0.0553                                 | 0.0998                                  | 0.0332                                           | 0.0903                                | 0.0246                                   | 0.0532                                  |                                                   |
| 0.0635                                | 0.0034                                    | 0.0645                                    | 0.0532                                 | 0.0959                                  | 0.0319                                           | 0.0868                                | 0.0237                                   | 0.0511                                  |                                                   |
| 0.0583                                | 0.0047                                    | 0.0685                                    | 0.0452                                 | 0.0301                                  | 0.0327                                           | 0.0948                                | 0.0262                                   | 0.0728                                  |                                                   |

|        |        |        |        |        |        |        |        |        |      |
|--------|--------|--------|--------|--------|--------|--------|--------|--------|------|
| 0.0591 | 0.0059 | 0.066  | 0.0464 | 0.0317 | 0.0373 | 0.0985 | 0.0255 | 0.059  |      |
| 0.0506 | 0.0039 | 0.0653 | 0.0392 | 0.022  | 0.0317 | 0.08   | 0.0234 | 0.062  |      |
| 0.0489 | 0.005  | 0.0524 | 0.0325 | 0.0389 | 0.0286 | 0.0763 | 0.018  | 0.0383 |      |
| 0.0454 | 0.0036 | 0.0534 | 0.0364 | 0.0253 | 0.0309 | 0.0688 | 0.0186 | 0.0509 |      |
| 0.0396 | 0.0043 | 0.0455 | 0.0334 | 0.0274 | 0.0255 | 0.058  | 0.0139 | 0.036  |      |
| 0.0424 | 0.005  | 0.0491 | 0.0341 | 0.017  | 0.0276 | 0.0697 | 0.017  | 0.0388 |      |
| 0.0635 | 0.0034 | 0.0645 | 0.0532 | 0.0959 | 0.0319 | 0.0868 | 0.0237 | 0.0511 |      |
| 0.061  | 0.0033 | 0.062  | 0.0511 | 0.0922 | 0.0307 | 0.0835 | 0.0227 | 0.0492 |      |
| 0.0561 | 0.0045 | 0.0658 | 0.0435 | 0.0289 | 0.0314 | 0.0912 | 0.0252 | 0.07   |      |
| 0.0569 | 0.0057 | 0.0634 | 0.0446 | 0.0305 | 0.0359 | 0.0947 | 0.0245 | 0.0568 |      |
| 0.0641 | 0.0058 | 0.0696 | 0.051  | 0.1834 | 0.0391 | 0.1083 | 0.029  | 0.0664 |      |
| 0.0614 | 0.0066 | 0.0697 | 0.0481 | 0.0306 | 0.0409 | 0.1066 | 0.028  | 0.0549 |      |
| 0.0544 | 0.0042 | 0.0702 | 0.0422 | 0.0237 | 0.0339 | 0.086  | 0.0251 | 0.0667 |      |
| 0.0488 | 0.0054 | 0.0362 | 0.06   | 0.0352 | 0.0284 | 0.0781 | 0.019  | 0.0384 |      |
| 0.0542 | 0.0056 | 0.0611 | 0.0419 | 0.028  | 0.0333 | 0.0835 | 0.0202 | 0.0583 |      |
| 0.062  | 0.0058 | 0.0686 | 0.0495 | 0.032  | 0.0388 | 0.1062 | 0.0276 | 0.0602 |      |
| 0.0526 | 0.0058 | 0.0563 | 0.0457 | 0.0418 | 0.0308 | 0.0821 | 0.0193 | 0.0412 |      |
| 0.0488 | 0.0039 | 0.0574 | 0.0391 | 0.0272 | 0.0332 | 0.0739 | 0.02   | 0.0547 |      |
| 0.0425 | 0.0046 | 0.049  | 0.036  | 0.0294 | 0.0274 | 0.0623 | 0.015  | 0.0387 |      |
| 0.0456 | 0.0054 | 0.0528 | 0.0366 | 0.0183 | 0.0297 | 0.0749 | 0.0182 | 0.0418 |      |
| 0.0682 | 0.0037 | 0.0694 | 0.0572 | 0.103  | 0.0342 | 0.0933 | 0.0254 | 0.055  | 3.05 |
| 0.0656 | 0.0035 | 0.0667 | 0.055  | 0.0991 | 0.033  | 0.0897 | 0.0245 | 0.0529 | 0.98 |
| 0.0603 | 0.0048 | 0.0708 | 0.0468 | 0.0311 | 0.0337 | 0.098  | 0.0271 | 0.0753 | 0.27 |
| 0.0611 | 0.0061 | 0.0682 | 0.048  | 0.0328 | 0.0386 | 0.1017 | 0.0263 | 0.061  | 0.76 |
| 0.0689 | 0.0062 | 0.0749 | 0.0548 | 0.1972 | 0.0421 | 0.1164 | 0.0311 | 0.0713 | 0.41 |
| 0.0436 | 0.0048 | 0.0325 | 0.0537 | 0.0316 | 0.0254 | 0.0699 | 0.017  | 0.0344 | 3.71 |
| 0.0484 | 0.005  | 0.0546 | 0.0375 | 0.025  | 0.0299 | 0.0747 | 0.0181 | 0.0521 | 0.71 |
| 0.0554 | 0.0052 | 0.0613 | 0.0443 | 0.0286 | 0.0347 | 0.095  | 0.0247 | 0.0539 | 2.65 |
| 0.0471 | 0.0052 | 0.0504 | 0.0409 | 0.0374 | 0.0275 | 0.0734 | 0.0173 | 0.0368 | 0.71 |
| 0.0436 | 0.0035 | 0.0513 | 0.035  | 0.0243 | 0.0297 | 0.0661 | 0.0179 | 0.049  | 0.68 |
| 0.038  | 0.0041 | 0.0438 | 0.0323 | 0.0263 | 0.0245 | 0.0558 | 0.0134 | 0.0346 | 1.71 |
| 0.0408 | 0.0048 | 0.0472 | 0.0329 | 0.0163 | 0.0266 | 0.067  | 0.0163 | 0.0373 | 2.30 |
| 0.061  | 0.0033 | 0.062  | 0.0511 | 0.0922 | 0.0307 | 0.0835 | 0.0227 | 0.0492 | 2.58 |
| 0.0587 | 0.0032 | 0.0596 | 0.0491 | 0.0887 | 0.0295 | 0.0803 | 0.0219 | 0.0473 | 2.03 |
| 0.0817 | 0.0048 | 0.0924 | 0.0643 | 0.0735 | 0.0495 | 0.0832 | 0.0328 | 0.1066 |      |

|        |        |        |        |        |        |        |        |        |      |
|--------|--------|--------|--------|--------|--------|--------|--------|--------|------|
| 0.0831 | 0.0073 | 0.0909 | 0.0649 | 0.1545 | 0.0497 | 0.0894 | 0.0332 | 0.1132 |      |
| 0.091  | 0.0078 | 0.0959 | 0.0699 | 0.2144 | 0.0562 | 0.0959 | 0.0406 | 0.1295 |      |
| 0.0715 | 0.005  | 0.0734 | 0.0574 | 0.4594 | 0.0397 | 0.0877 | 0.0321 | 0.0858 |      |
| 0.0828 | 0.0076 | 0.0866 | 0.0642 | 0.2415 | 0.0514 | 0.0901 | 0.0331 | 0.1095 |      |
| 0.0804 | 0.008  | 0.066  | 0.0843 | 0.0623 | 0.0562 | 0.086  | 0.0289 | 0.0728 |      |
| 0.0814 | 0.0068 | 0.093  | 0.0641 | 0.0639 | 0.0469 | 0.0867 | 0.0326 | 0.1141 |      |
| 0.0581 | 0.0044 | 0.0672 | 0.0449 | 0.0381 | 0.0322 | 0.0703 | 0.0262 | 0.0747 |      |
| 0.0589 | 0.0055 | 0.0647 | 0.046  | 0.0402 | 0.0369 | 0.073  | 0.0255 | 0.0605 |      |
| 0.0435 | 0.0045 | 0.0319 | 0.0532 | 0.04   | 0.0251 | 0.0518 | 0.017  | 0.0352 |      |
| 0.0482 | 0.0046 | 0.0536 | 0.0372 | 0.0318 | 0.0295 | 0.0553 | 0.0181 | 0.0535 |      |
| 0.0552 | 0.0049 | 0.0602 | 0.0439 | 0.0363 | 0.0342 | 0.0704 | 0.0247 | 0.0552 |      |
| 0.0469 | 0.0048 | 0.0494 | 0.0405 | 0.0475 | 0.0272 | 0.0544 | 0.0173 | 0.0378 |      |
| 0.0435 | 0.0032 | 0.0504 | 0.0347 | 0.0309 | 0.0293 | 0.049  | 0.0179 | 0.0502 |      |
| 0.0879 | 0.0052 | 0.0994 | 0.0692 | 0.079  | 0.0532 | 0.0895 | 0.0352 | 0.1147 | 7.23 |
| 0.0893 | 0.0076 | 0.0967 | 0.0695 | 0.1662 | 0.0535 | 0.0962 | 0.0356 | 0.1217 | 7.33 |
| 0.0978 | 0.0084 | 0.103  | 0.0752 | 0.2306 | 0.0604 | 0.103  | 0.0436 | 0.1393 | 7.09 |
| 0.0769 | 0.0054 | 0.0789 | 0.0617 | 0.494  | 0.0427 | 0.0943 | 0.0344 | 0.0922 | 6.55 |
| 0.089  | 0.0082 | 0.0931 | 0.0691 | 0.2597 | 0.0553 | 0.0969 | 0.0355 | 0.1177 | 3.46 |
| 0.0865 | 0.0086 | 0.071  | 0.0907 | 0.067  | 0.0604 | 0.0925 | 0.0311 | 0.0783 | 3.23 |
| 0.0875 | 0.0073 | 0.0999 | 0.069  | 0.0687 | 0.0504 | 0.0932 | 0.0349 | 0.1227 | 3.07 |
| 0.0815 | 0.0048 | 0.0921 | 0.0641 | 0.0732 | 0.0493 | 0.083  | 0.0327 | 0.1063 | 7.84 |
| 0.0828 | 0.0073 | 0.0906 | 0.0648 | 0.1541 | 0.0496 | 0.0892 | 0.0331 | 0.1128 | 8.71 |
| 0.0907 | 0.0078 | 0.0956 | 0.0697 | 0.2138 | 0.056  | 0.0956 | 0.0405 | 0.1291 |      |
| 0.0713 | 0.005  | 0.0731 | 0.0572 | 0.458  | 0.0396 | 0.0875 | 0.032  | 0.0855 |      |
| 0.0825 | 0.0076 | 0.0863 | 0.064  | 0.2407 | 0.0513 | 0.0898 | 0.033  | 0.1091 |      |
| 0.0802 | 0.008  | 0.0658 | 0.0841 | 0.0621 | 0.056  | 0.0857 | 0.0288 | 0.0726 |      |
| 0.0811 | 0.0068 | 0.0927 | 0.0639 | 0.0637 | 0.0467 | 0.0864 | 0.0325 | 0.1138 |      |
| 0.0507 | 0.0062 | 0.0611 | 0.0407 | 0.0333 | 0.0317 | 0.0583 | 0.023  | 0.0644 | 8.61 |
| 0.0566 | 0.0053 | 0.0698 | 0.0447 | 0.0311 | 0.0357 | 0.0687 | 0.0252 | 0.0736 | 9.58 |
| 0.0577 | 0.0047 | 0.0779 | 0.0459 | 0.0243 | 0.0374 | 0.0699 | 0.0253 | 0.0745 | 7.64 |
| 0.0586 | 0.0051 | 0.0749 | 0.0464 | 0.0271 | 0.0376 | 0.0708 | 0.0257 | 0.0761 | 8.52 |
| 0.0468 | 0.0041 | 0.0569 | 0.0372 | 0.0357 | 0.0304 | 0.0543 | 0.0213 | 0.0598 | 3.19 |
| 0.0553 | 0.0058 | 0.0601 | 0.0438 | 0.0386 | 0.0341 | 0.0681 | 0.0255 | 0.0717 | 8.61 |
| 0.0564 | 0.0044 | 0.0822 | 0.0453 | 0.0239 | 0.0368 | 0.069  | 0.0251 | 0.0722 | 9.58 |
| 0.0403 | 0.0031 | 0.0503 | 0.0327 | 0.036  | 0.0288 | 0.0437 | 0.0173 | 0.0486 | 7.64 |
| 0.0519 | 0.0054 | 0.063  | 0.0411 | 0.0362 | 0.0321 | 0.0639 | 0.0239 | 0.0673 | 8.52 |

|        |        |        |        |        |        |        |        |        |      |
|--------|--------|--------|--------|--------|--------|--------|--------|--------|------|
| 0.0547 | 0.0042 | 0.0651 | 0.0429 | 0.0399 | 0.0343 | 0.0628 | 0.0256 | 0.0717 | 3.19 |
| 0.0452 | 0.0088 | 0.0547 | 0.0378 | 0.0238 | 0.0284 | 0.0478 | 0.0193 | 0.0538 | 3.29 |
| 0.0547 | 0.0052 | 0.0379 | 0.0732 | 0.0206 | 0.0295 | 0.0634 | 0.0253 | 0.0628 | 3.51 |
| 0.0471 | 0.0057 | 0.0568 | 0.0378 | 0.0311 | 0.0295 | 0.0542 | 0.0214 | 0.0599 |      |
| 0.0526 | 0.0049 | 0.0649 | 0.0416 | 0.0289 | 0.0333 | 0.0639 | 0.0234 | 0.0684 |      |
| 0.0536 | 0.0044 | 0.0725 | 0.0427 | 0.0226 | 0.0348 | 0.065  | 0.0235 | 0.0693 |      |
| 0.0551 | 0.0047 | 0.0689 | 0.0435 | 0.0231 | 0.0355 | 0.0662 | 0.0238 | 0.0718 |      |
| 0.0435 | 0.0038 | 0.0559 | 0.0345 | 0.0333 | 0.0282 | 0.0505 | 0.0198 | 0.0556 |      |
| 0.0545 | 0.0047 | 0.0636 | 0.0432 | 0.0252 | 0.0349 | 0.0659 | 0.0239 | 0.0707 |      |
| 0.0524 | 0.0041 | 0.0764 | 0.0421 | 0.0222 | 0.0342 | 0.0642 | 0.0233 | 0.0671 |      |
| 0.0632 | 0.0053 | 0.0789 | 0.0498 | 0.0264 | 0.0407 | 0.0758 | 0.0273 | 0.0823 |      |
| 0.0601 | 0.0047 | 0.0875 | 0.0483 | 0.0255 | 0.0392 | 0.0735 | 0.0267 | 0.0769 |      |
| 0.0429 | 0.0033 | 0.0536 | 0.0347 | 0.0384 | 0.0307 | 0.0466 | 0.0184 | 0.0517 |      |
| 0.0593 | 0.005  | 0.0741 | 0.0468 | 0.0248 | 0.0382 | 0.0712 | 0.0256 | 0.0773 |      |
| 0.0583 | 0.0045 | 0.0623 | 0.0457 | 0.0425 | 0.0365 | 0.0669 | 0.0273 | 0.0763 |      |
| 0.0481 | 0.0094 | 0.0583 | 0.0403 | 0.0254 | 0.0303 | 0.0509 | 0.0206 | 0.0573 |      |
| 0.0583 | 0.0055 | 0.0404 | 0.078  | 0.0219 | 0.0314 | 0.0675 | 0.0269 | 0.0669 |      |
| 0.0519 | 0.0048 | 0.0629 | 0.0403 | 0.0241 | 0.0323 | 0.062  | 0.0227 | 0.0663 |      |

---
